# Supplementary material for: Substituted triphenylamines as building blocks for star shaped organic electronic materials
Source: Royal Society of Chemistry journal article supplement (doi:10.1039/c4nj01695e), 2015-01-01
Supplement: c4nj01695e1.pdf [file c4nj01695e1.pdf]

# Substituted Triphenylamines as Building Blocks for Star Shaped Organic Electronic Materials

## Supplementary Material

*Daniel Lumpi,<sup>a</sup> Brigitte Holzer,<sup>a</sup> Johannes Bintinger,<sup>a,b</sup> Ernst Horkel,<sup>a\*</sup> Simon Waid,<sup>c</sup> Heinz D. Wanzenböck,<sup>c</sup> Martina Marchetti-Deschmann,<sup>d</sup> Christian Hametner,<sup>a</sup> Emmerich Bertagnolli,<sup>c</sup> Ioannis Kymissis,<sup>b</sup> and Johannes Fröhlich<sup>a</sup>*

<sup>a</sup>Institute of Applied Synthetic Chemistry, Vienna University of Technology,

Getreidemarkt 9/163OC, A-1060 Vienna, Austria

<sup>b</sup>Department of Electrical Engineering, Columbia University,

520W 120<sup>th</sup> street, Suite 1300, 10027 New York, NY, United States

<sup>c</sup>Institute of Solid State Electronics, Vienna University of Technology,

Floragasse 7, A-1040 Vienna, Austria

<sup>d</sup>Institute of Chemical Technologies and Analytics, Vienna University of Technology,

Getreidemarkt 9/164IAC, A-1060 Vienna, Austria

[ernst.horkel@tuwien.ac.at](mailto:ernst.horkel@tuwien.ac.at)

# A) NMR Spectra

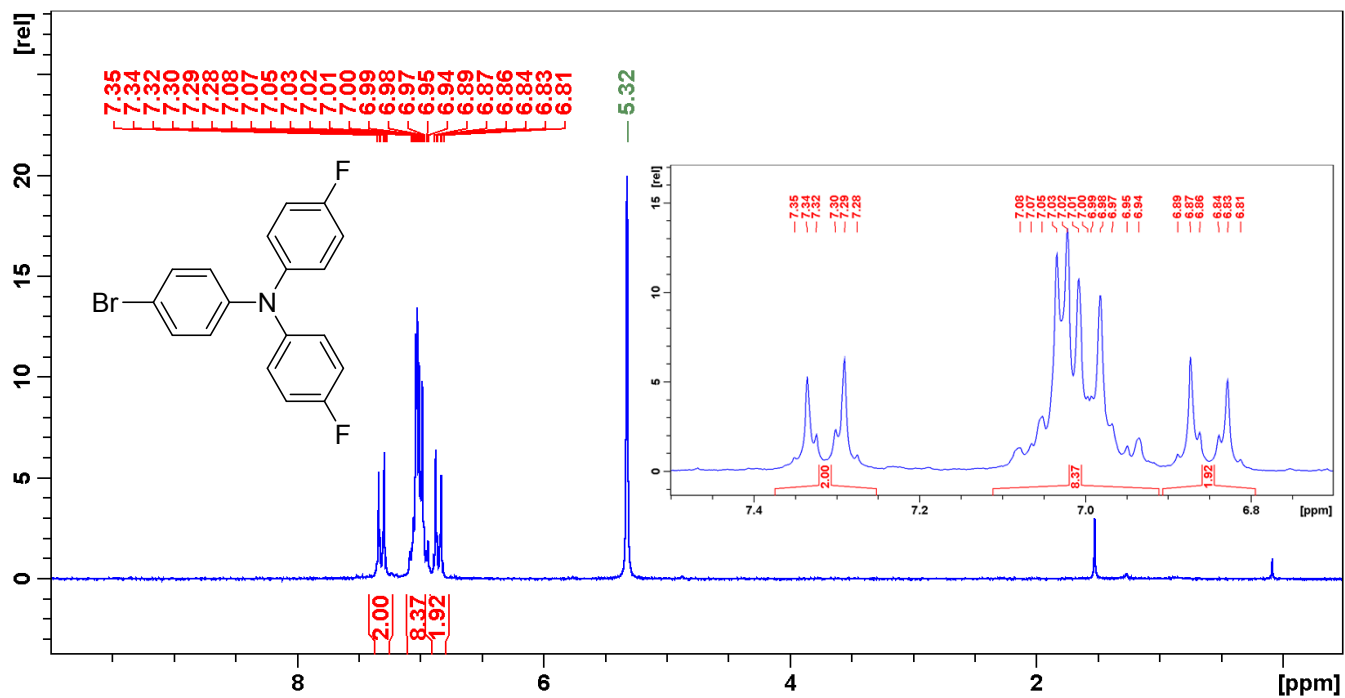

Figure S1. Proton NMR spectrum of compound **6c**.

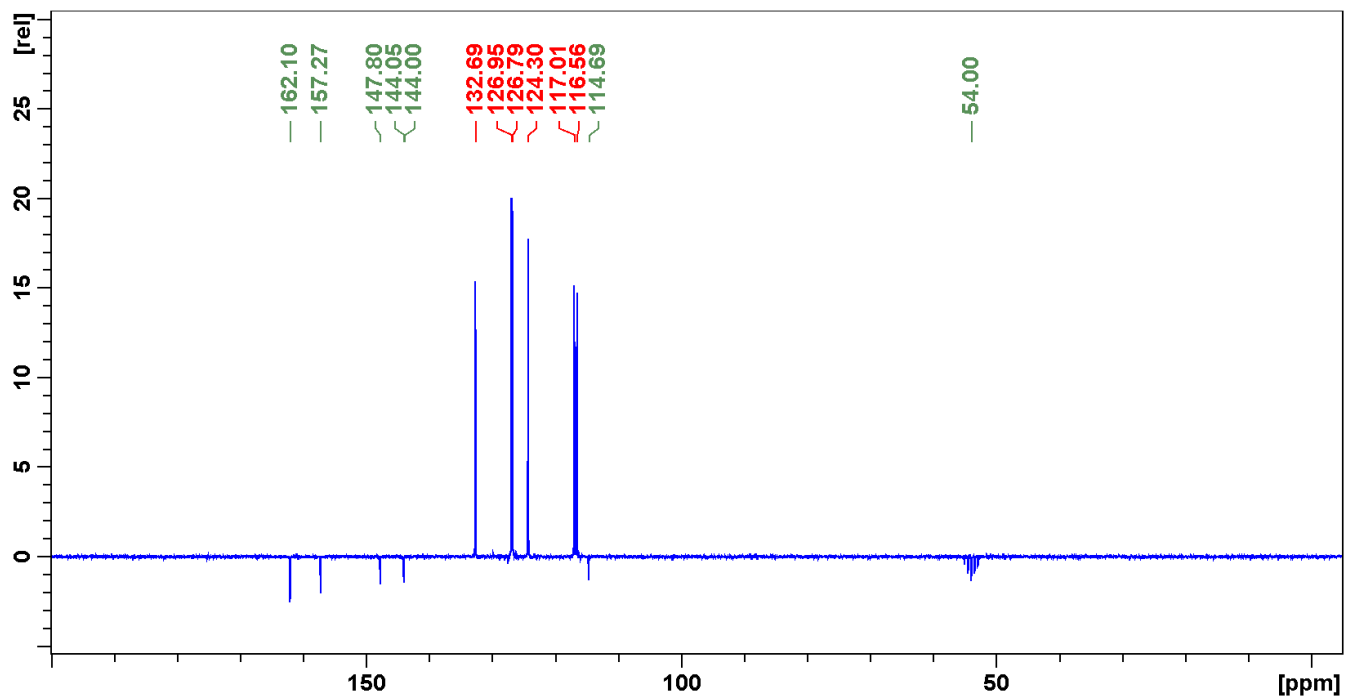

Figure S2. Carbon NMR spectrum of compound **6c**.

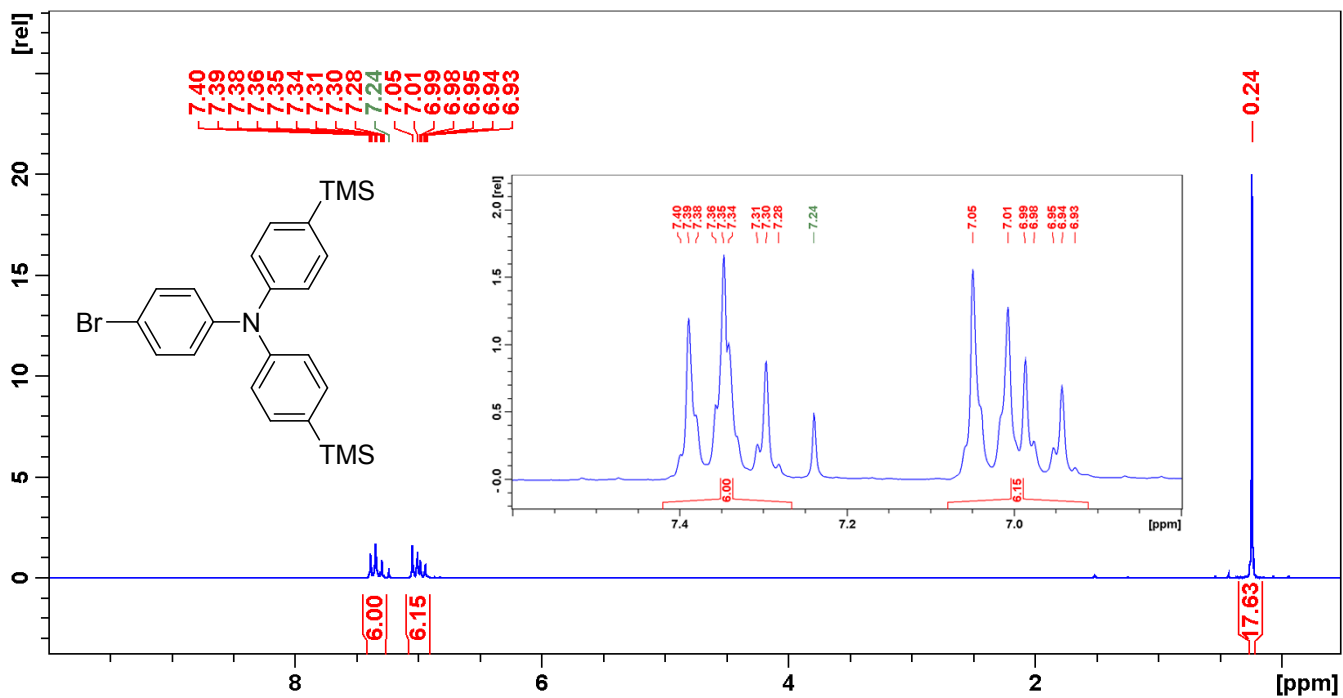

Figure S3. Proton NMR spectrum of compound 6e.

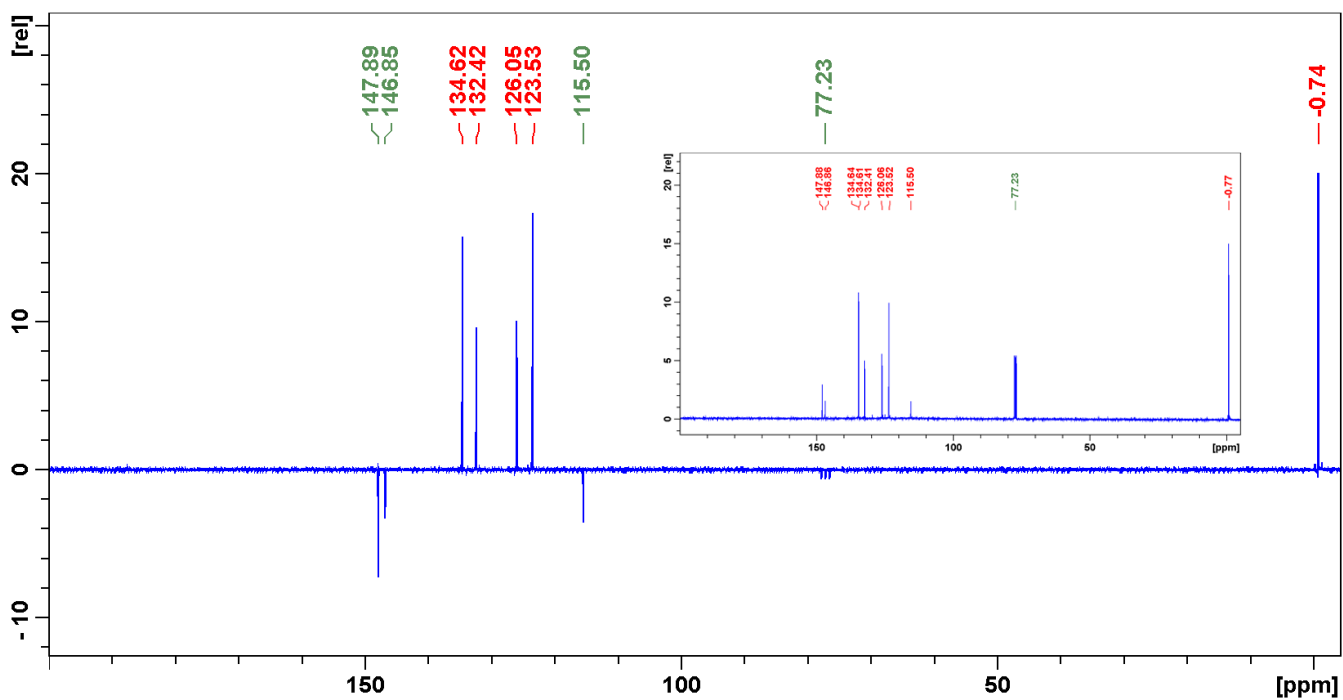

Figure S4. Carbon NMR spectrum of compound 6e.

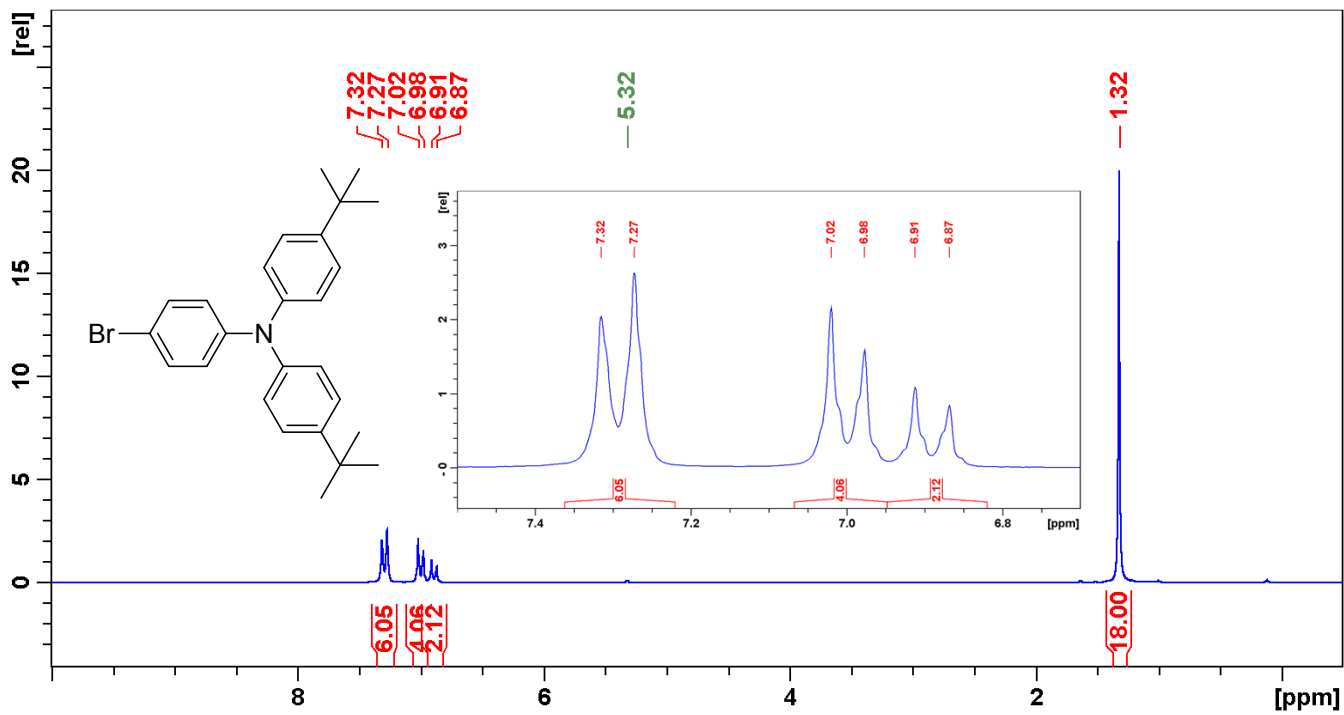

Figure S5. Proton NMR spectrum of compound **6f**.

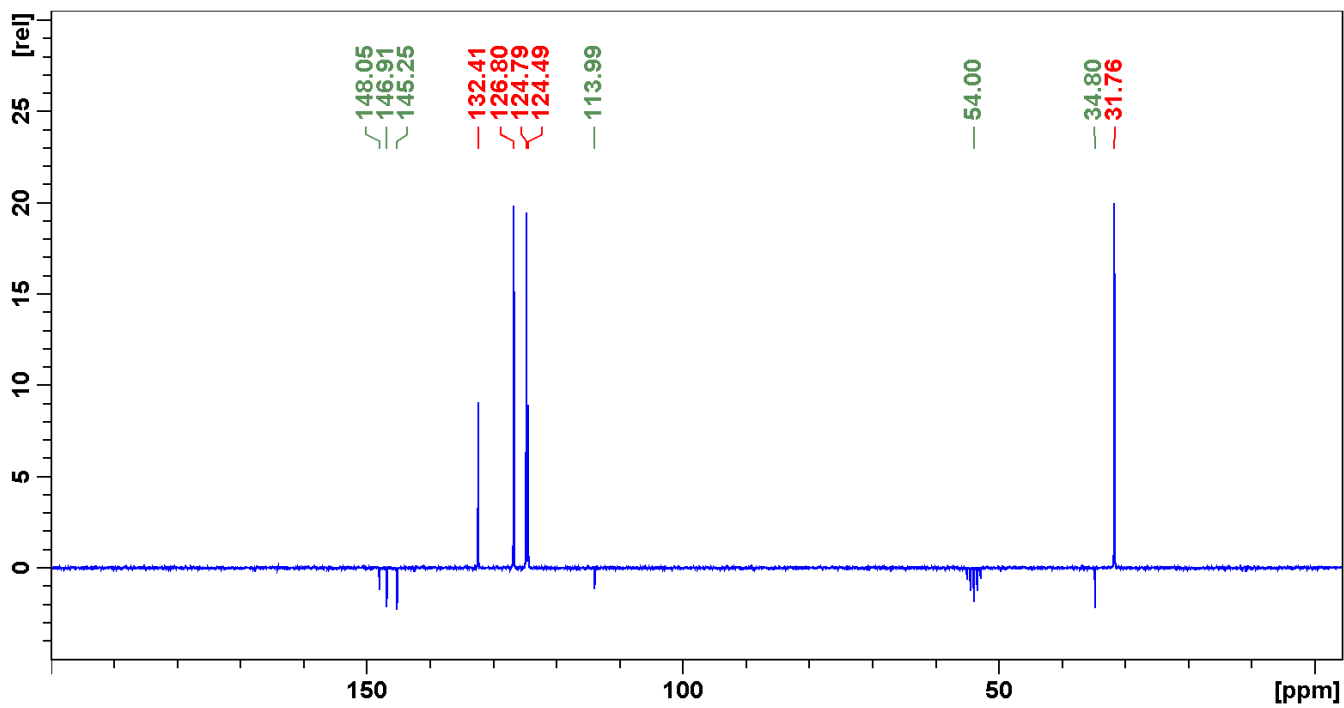

Figure S6. Carbon NMR spectrum of compound **6f**.

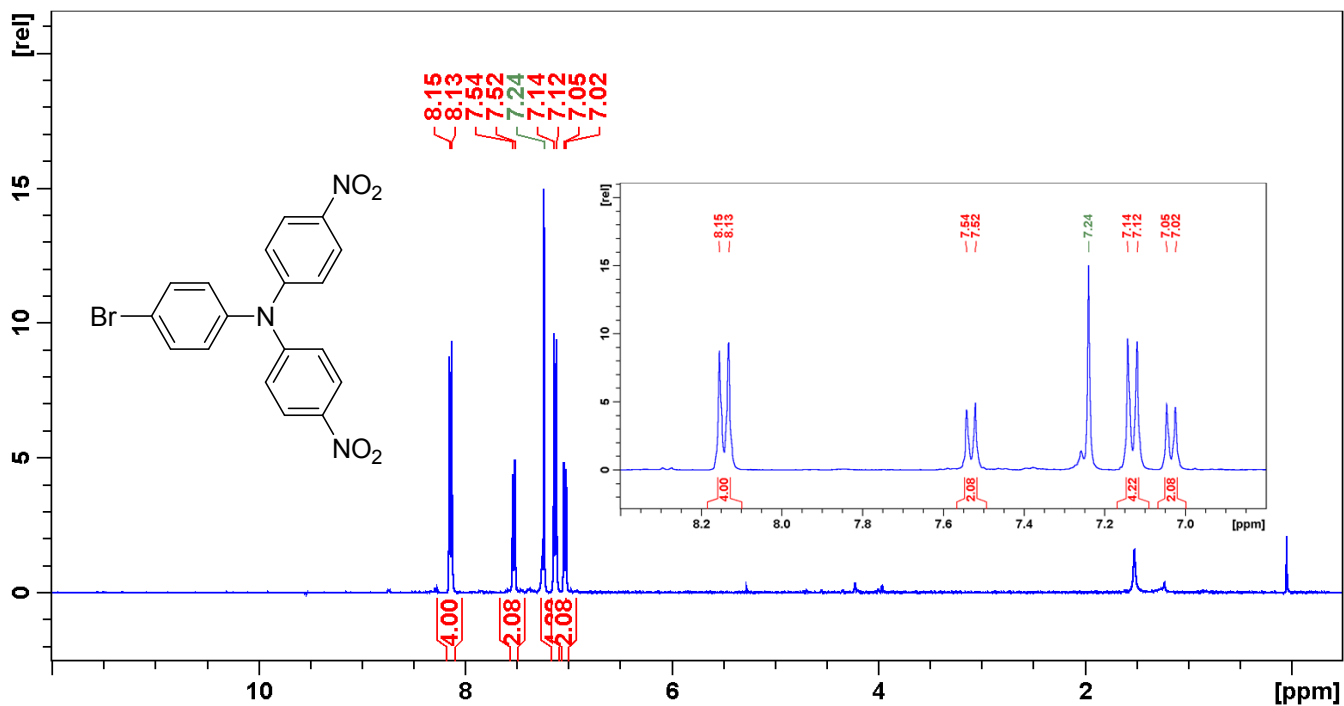

Figure S7. Proton NMR spectrum of compound **6g**.

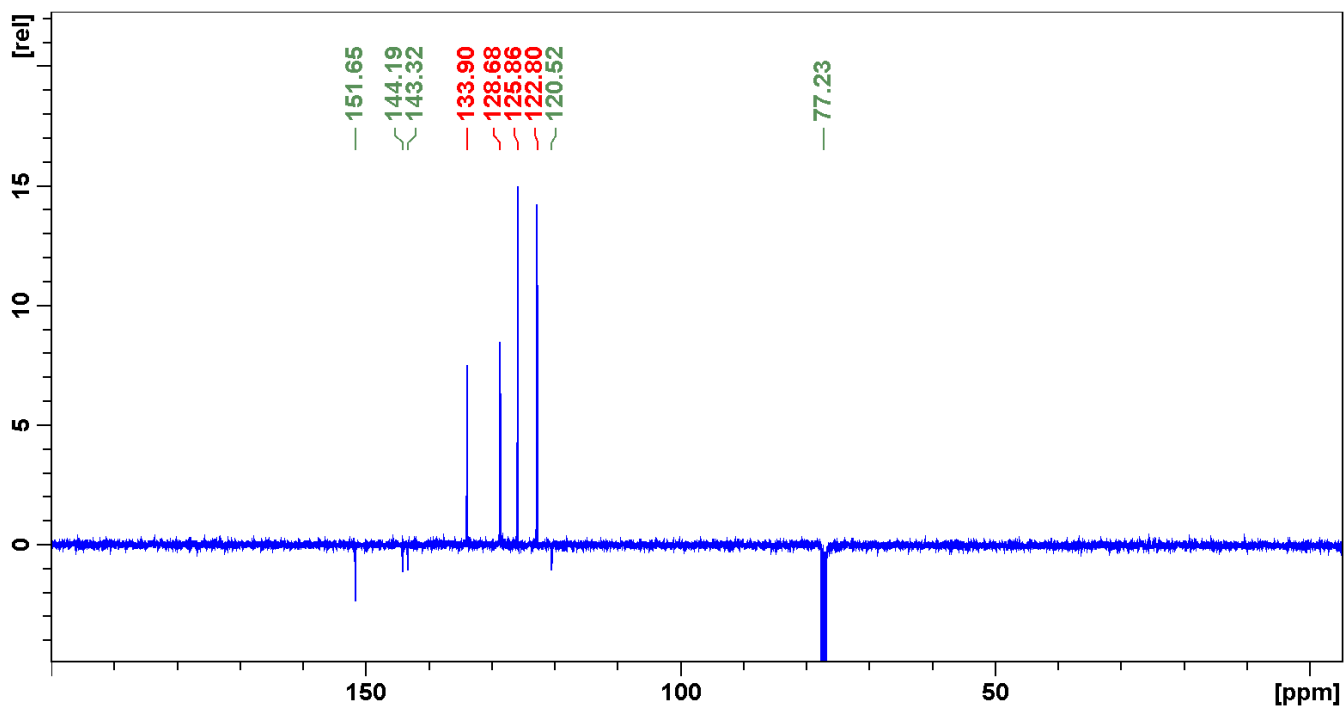

Figure S8. Carbon NMR spectrum of compound **6g**.

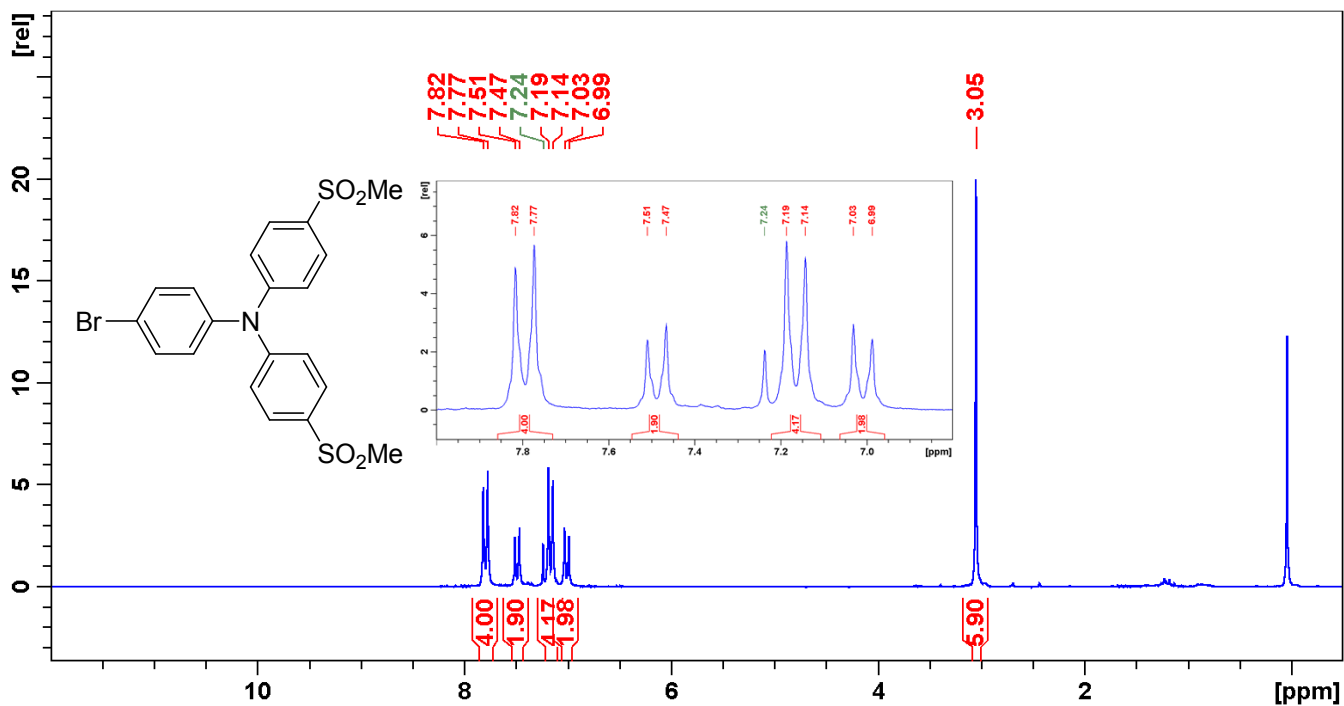

Figure S9. Proton NMR spectrum of compound **6h**.

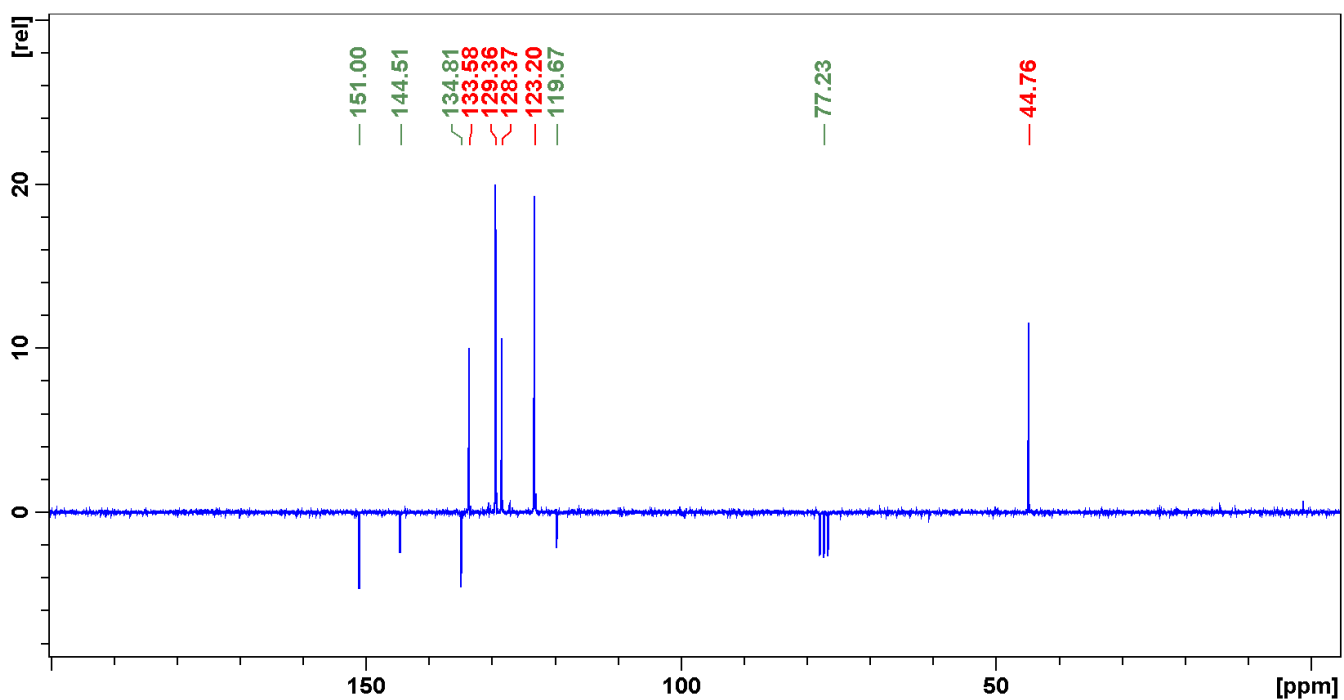

Figure S10. Carbon NMR spectrum of compound **6h**.

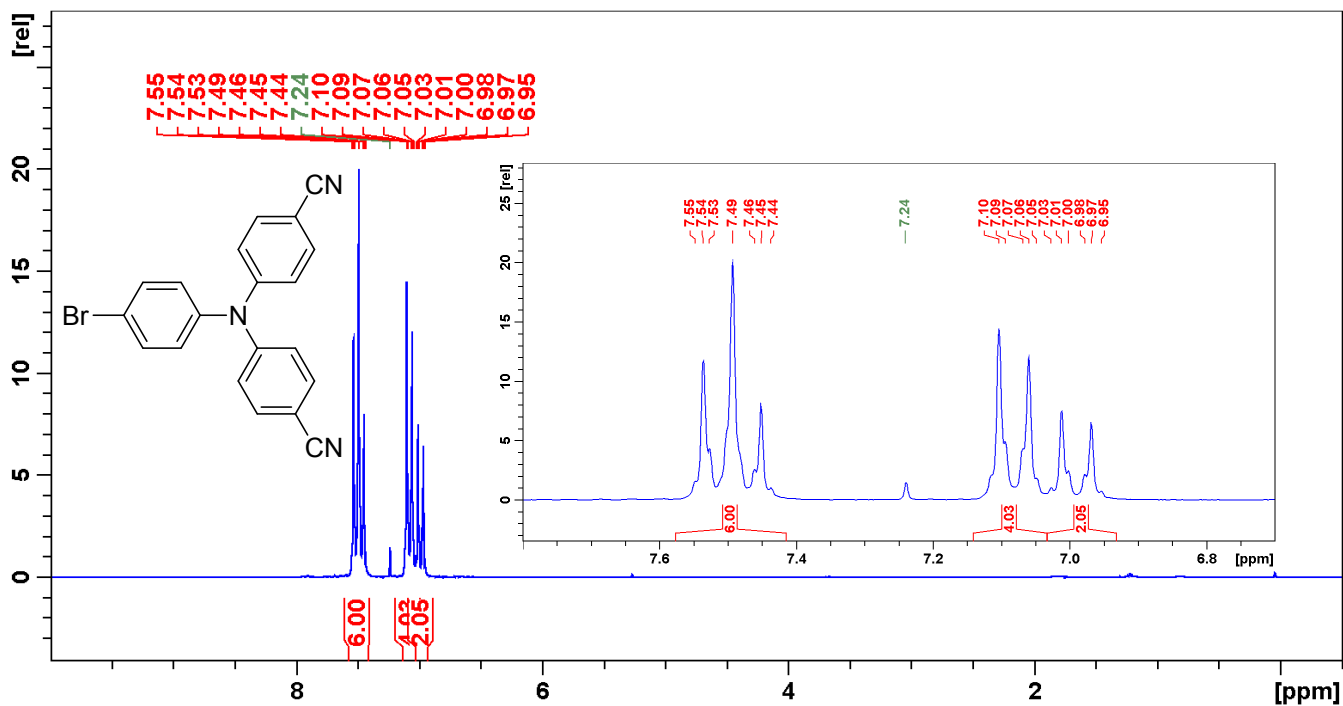

Figure S11. Proton NMR spectrum of compound **6i**.

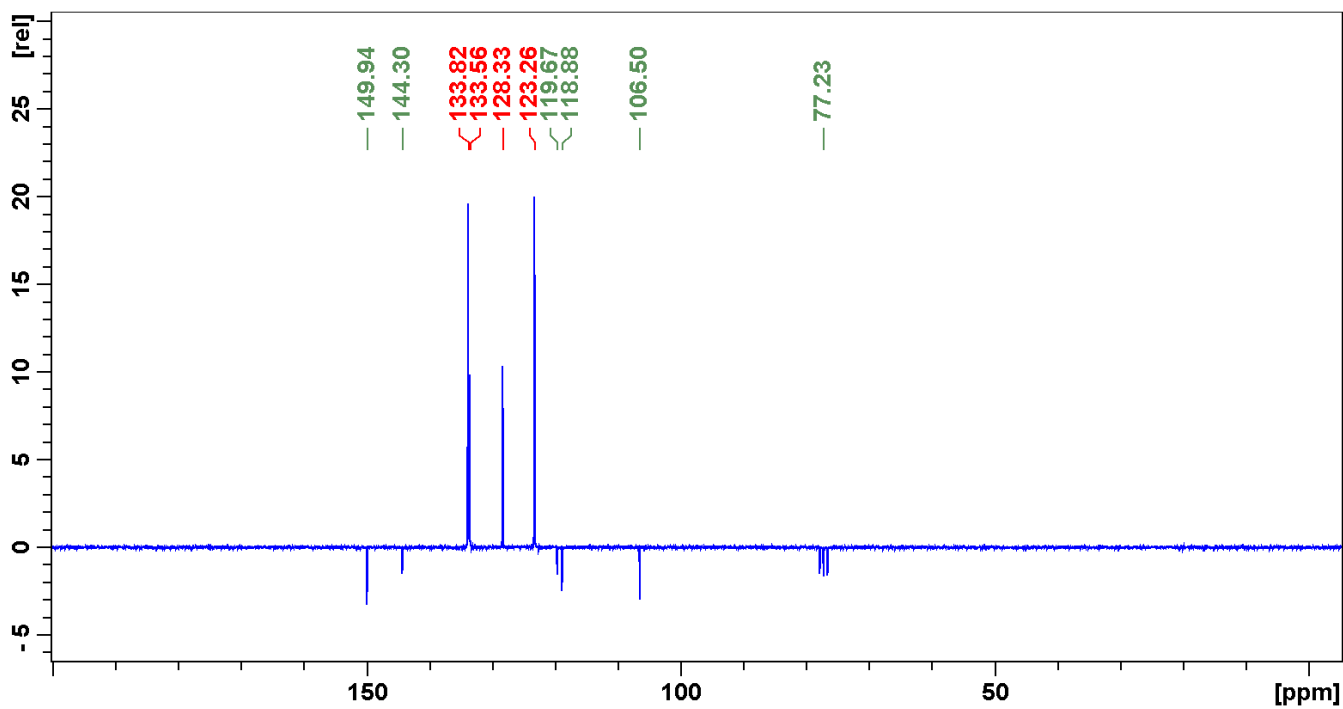

Figure S12. Carbon NMR spectrum of compound **6i**.

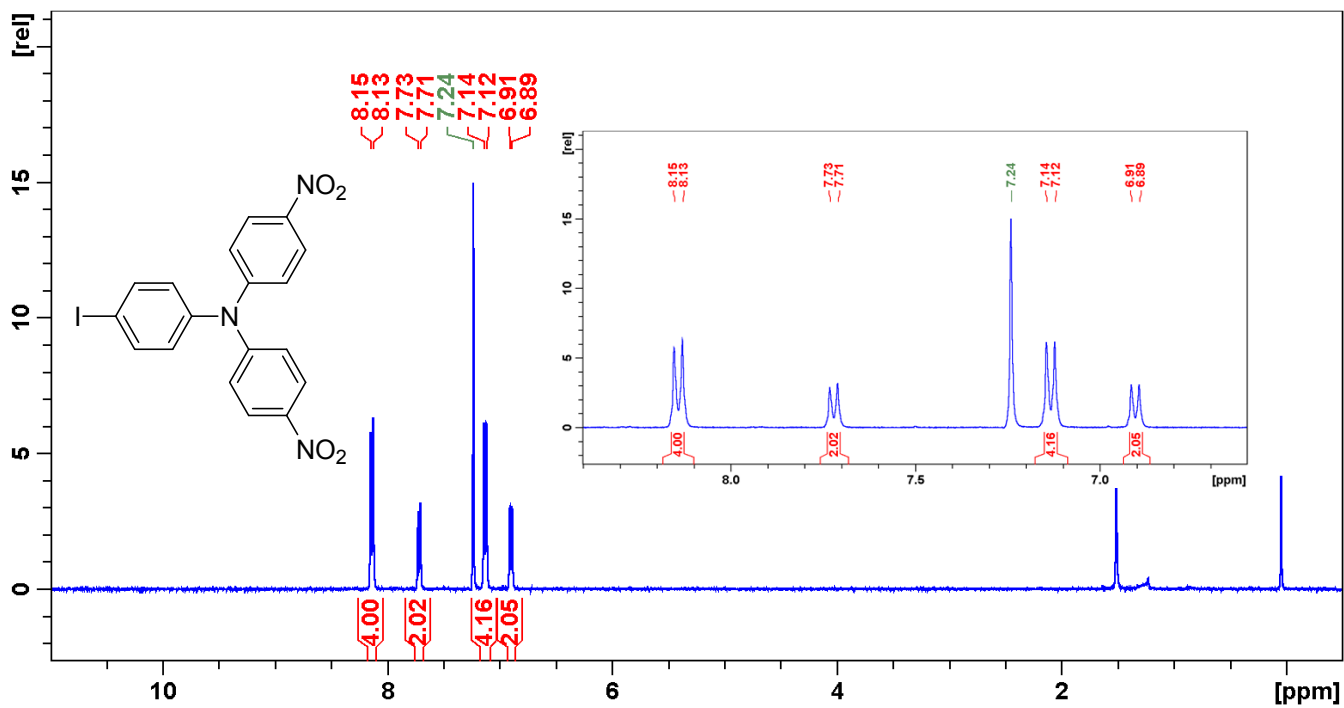

Figure S13. Proton NMR spectrum of compound **6j**.

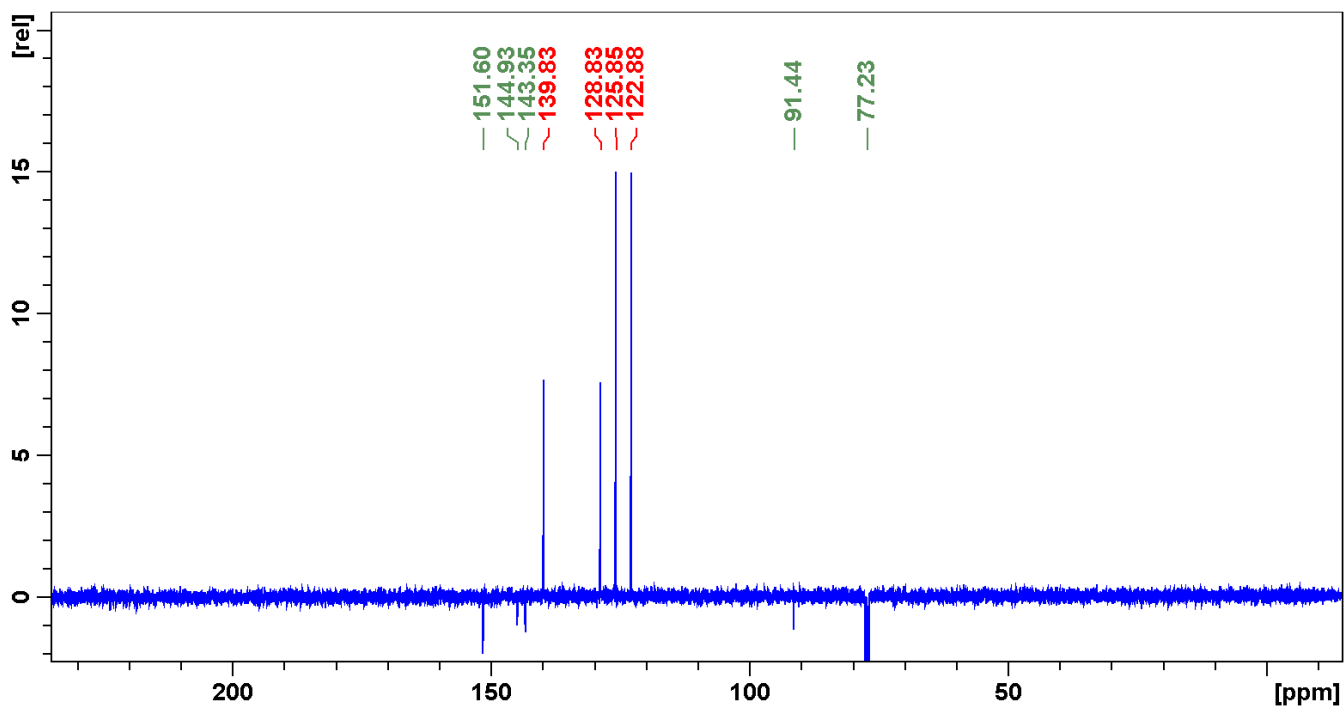

Figure S14. Carbon NMR spectrum of compound **6j**.



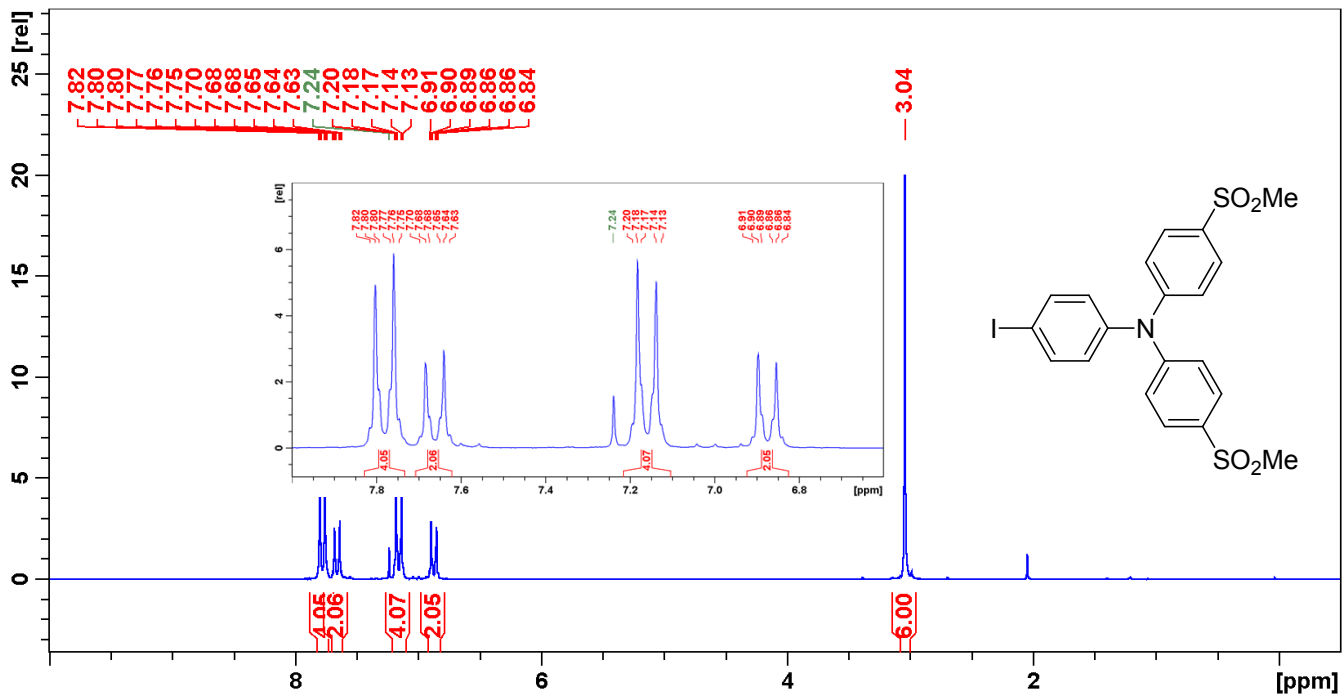

Figure S15. Proton NMR spectrum of compound **6k**.

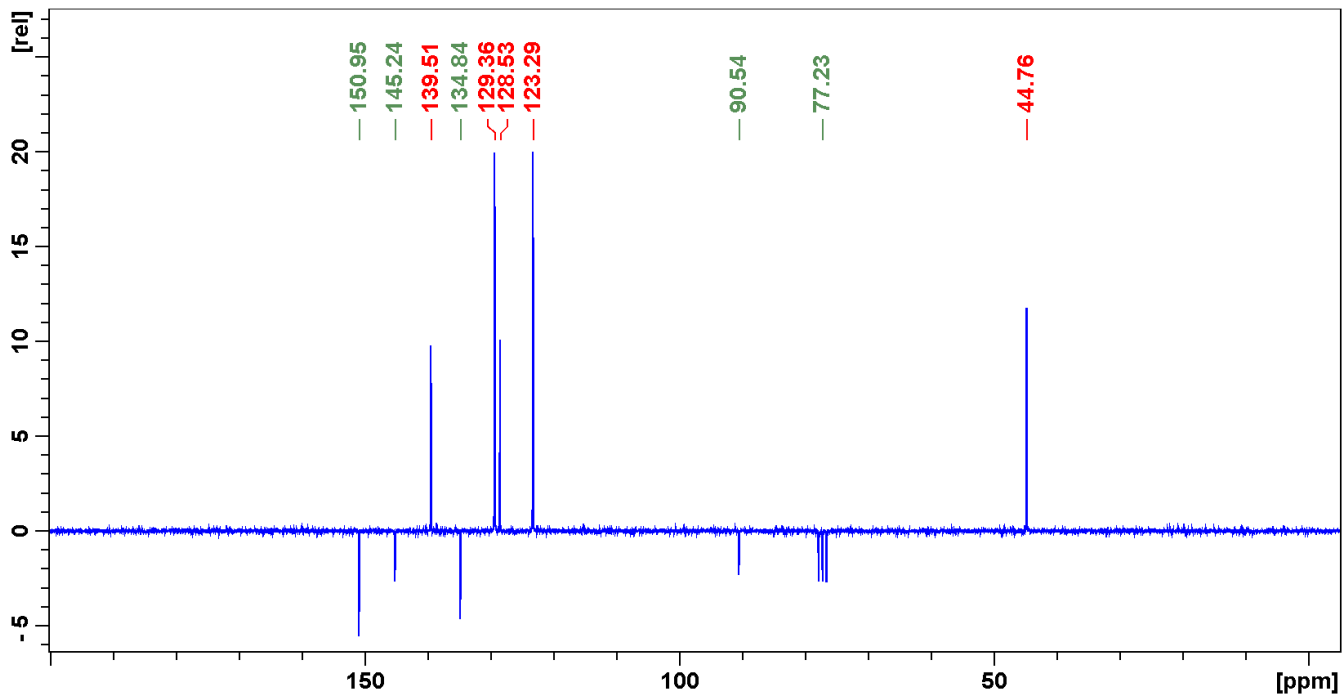

Figure S16. Carbon NMR spectrum of compound **6k**.

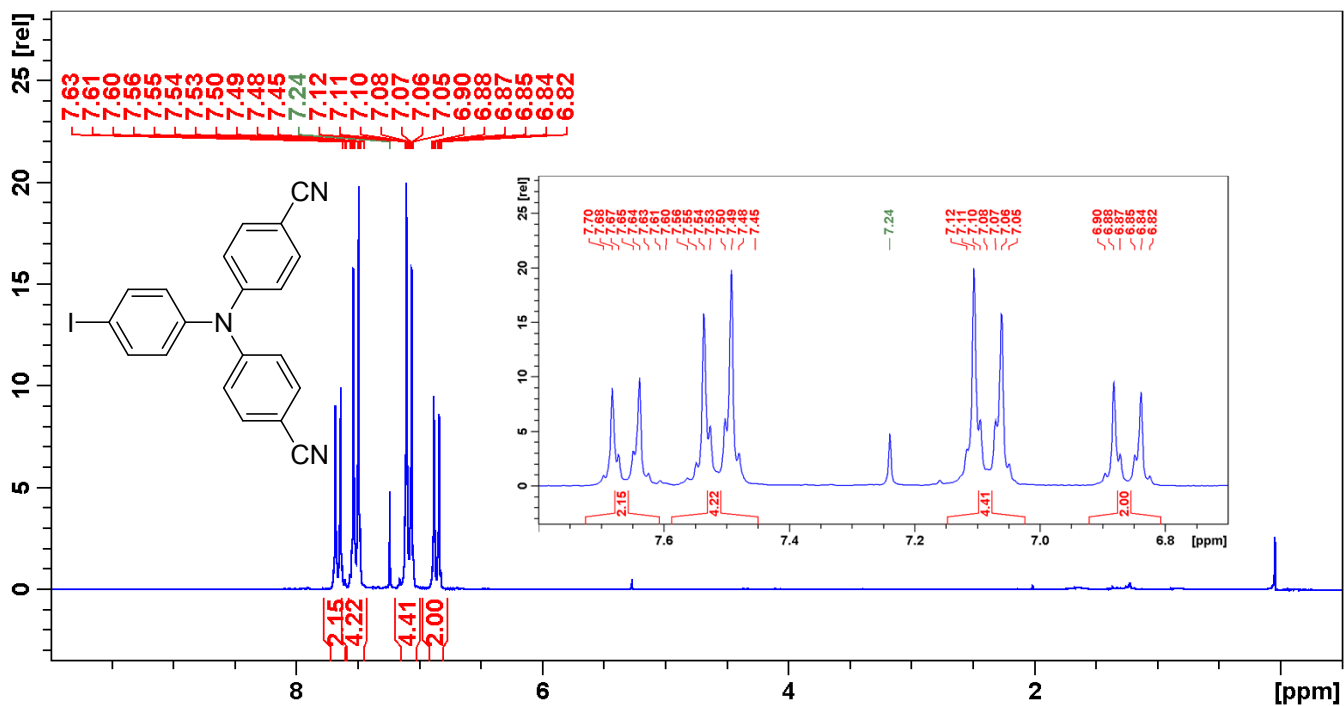

Figure S17. Proton NMR spectrum of compound **6I**.

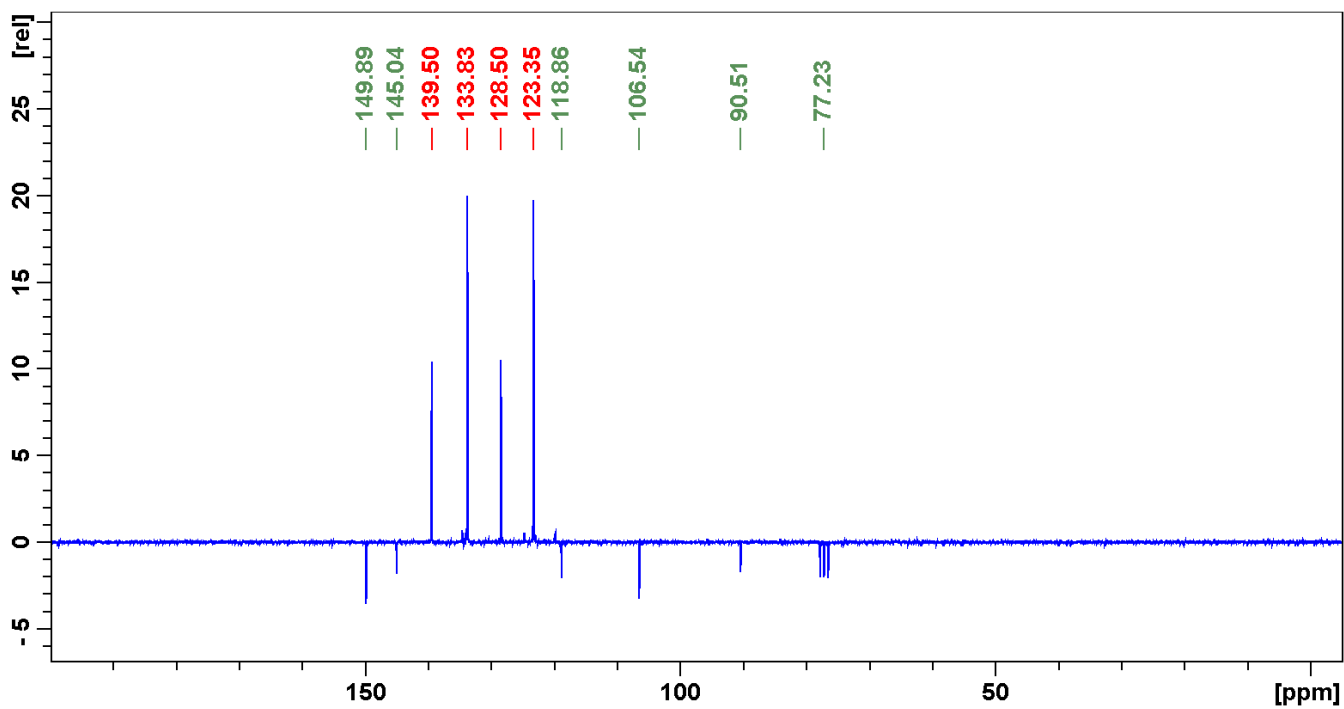

Figure S18. Carbon NMR spectrum of compound **6I**.

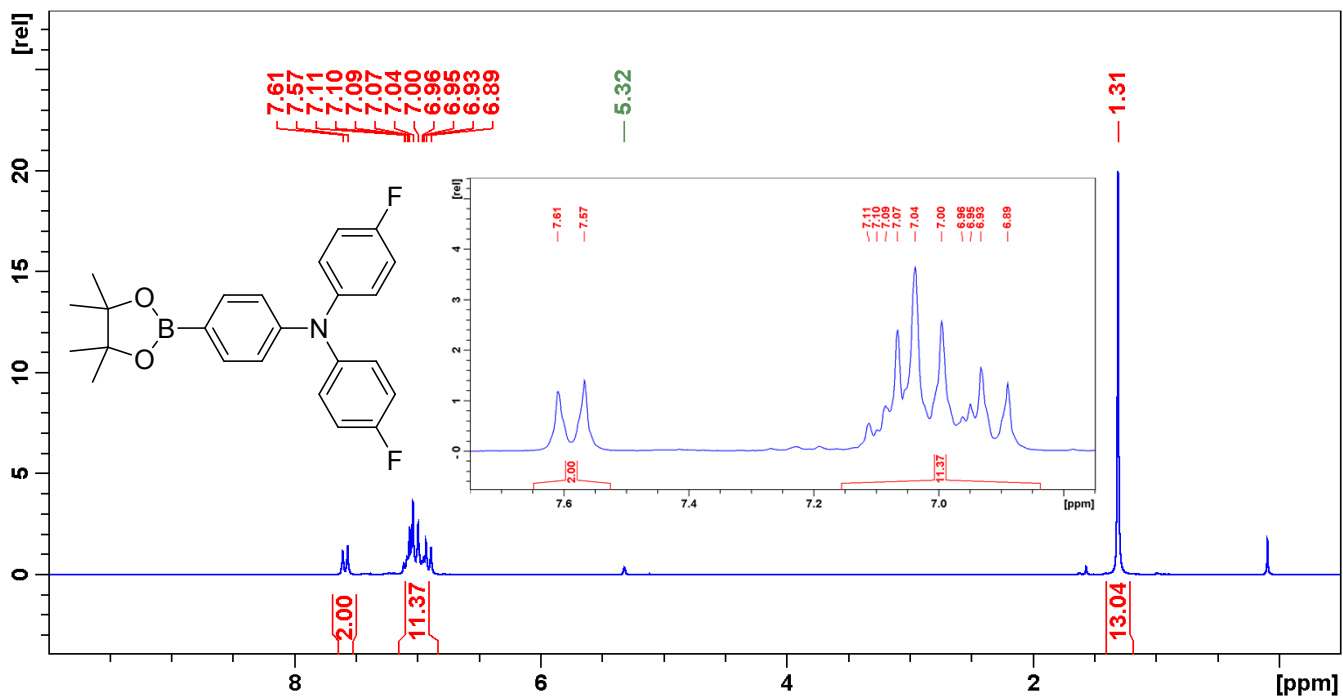

Figure S19. Proton NMR spectrum of compound **8c**.

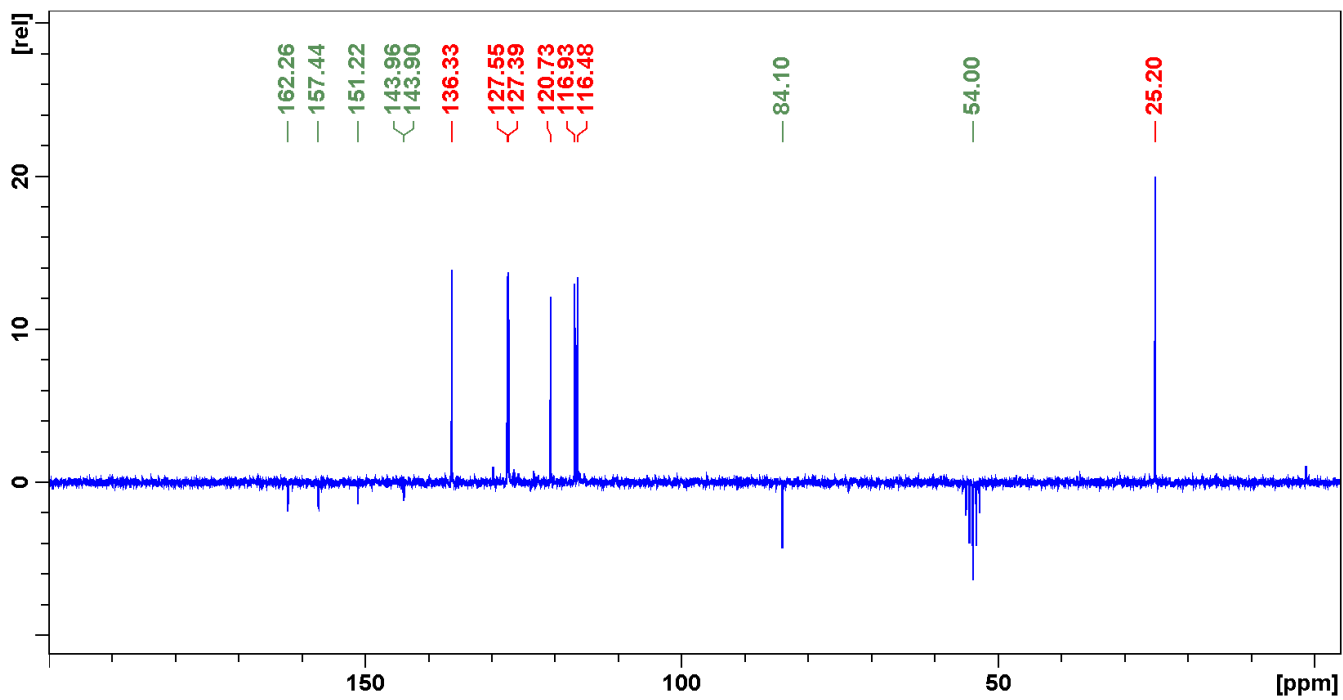

Figure S20. Carbon NMR spectrum of compound **8c**.

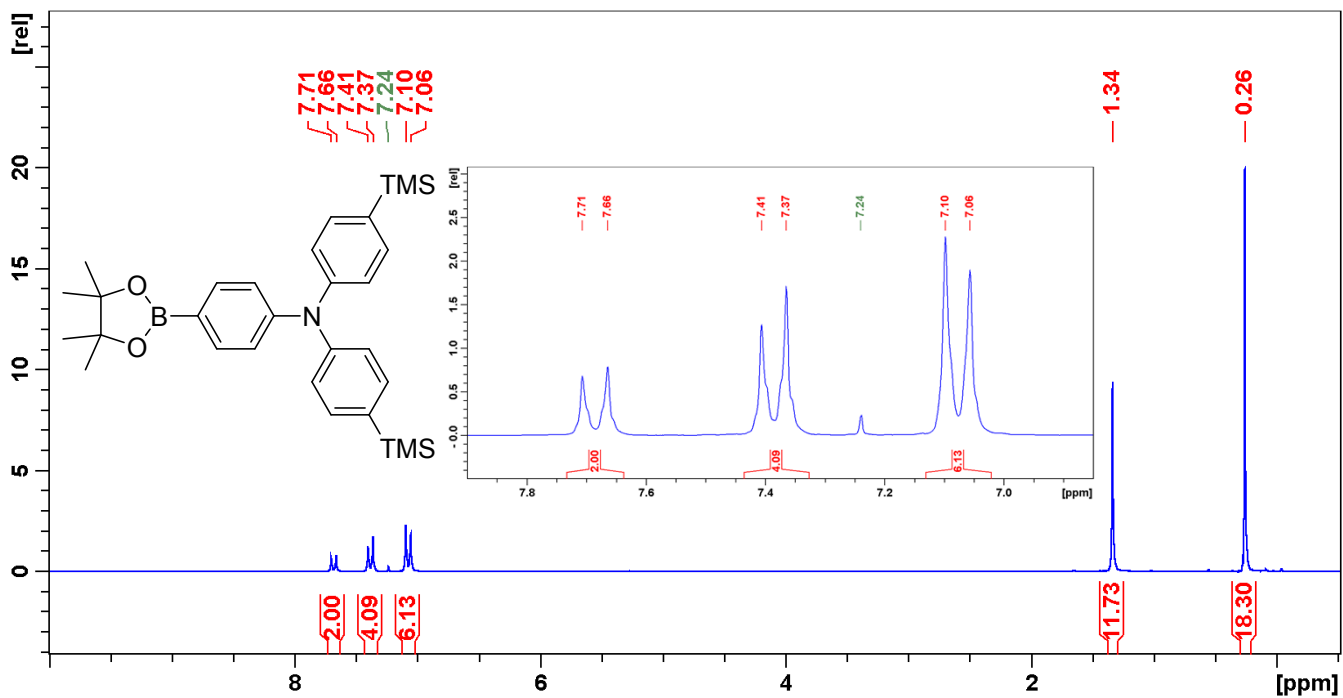

Figure S21. Proton NMR spectrum of compound **8e**.

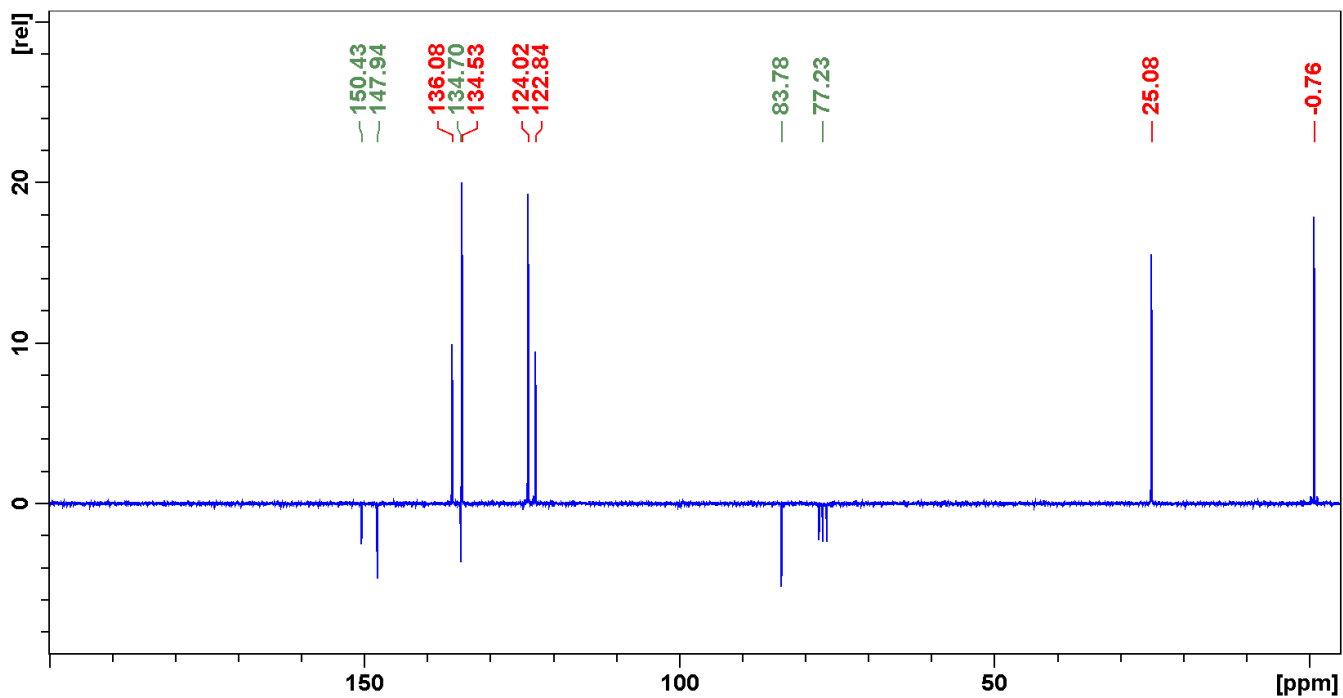

Figure S22. Carbon NMR spectrum of compound **8e**.

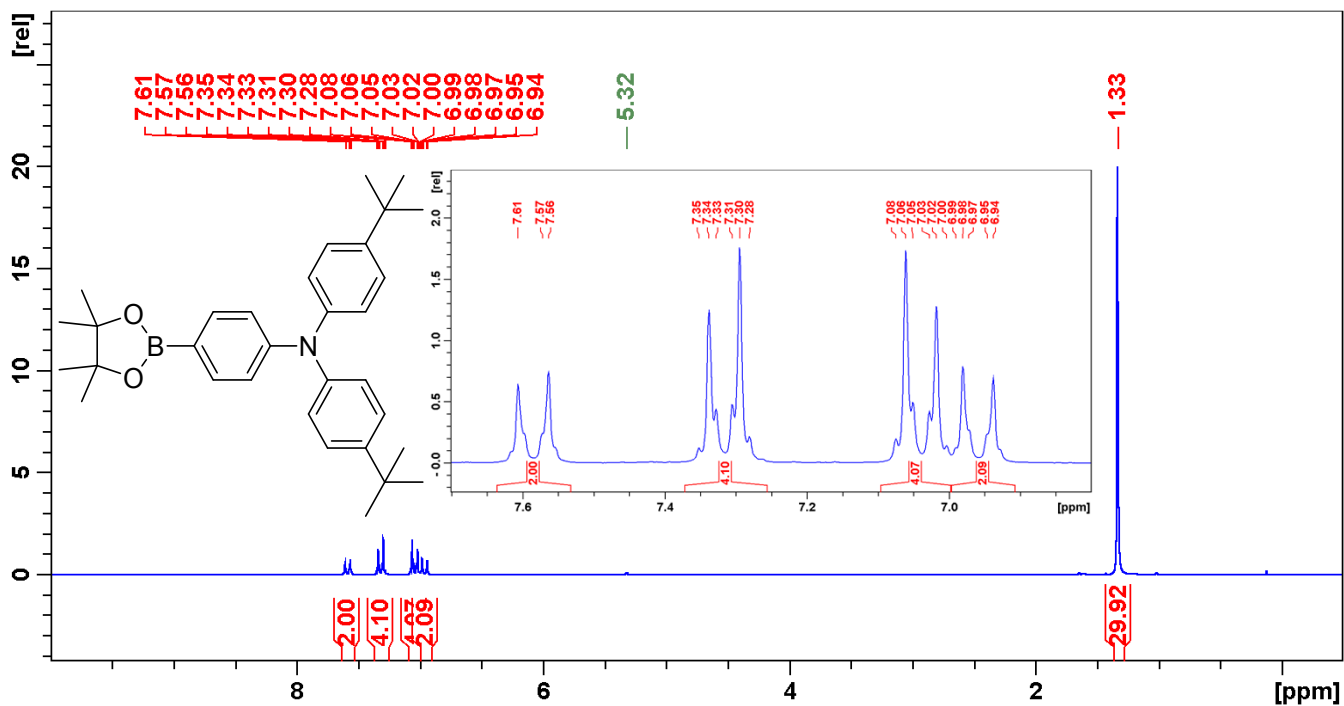

Figure S23. Proton NMR spectrum of compound **8f**.

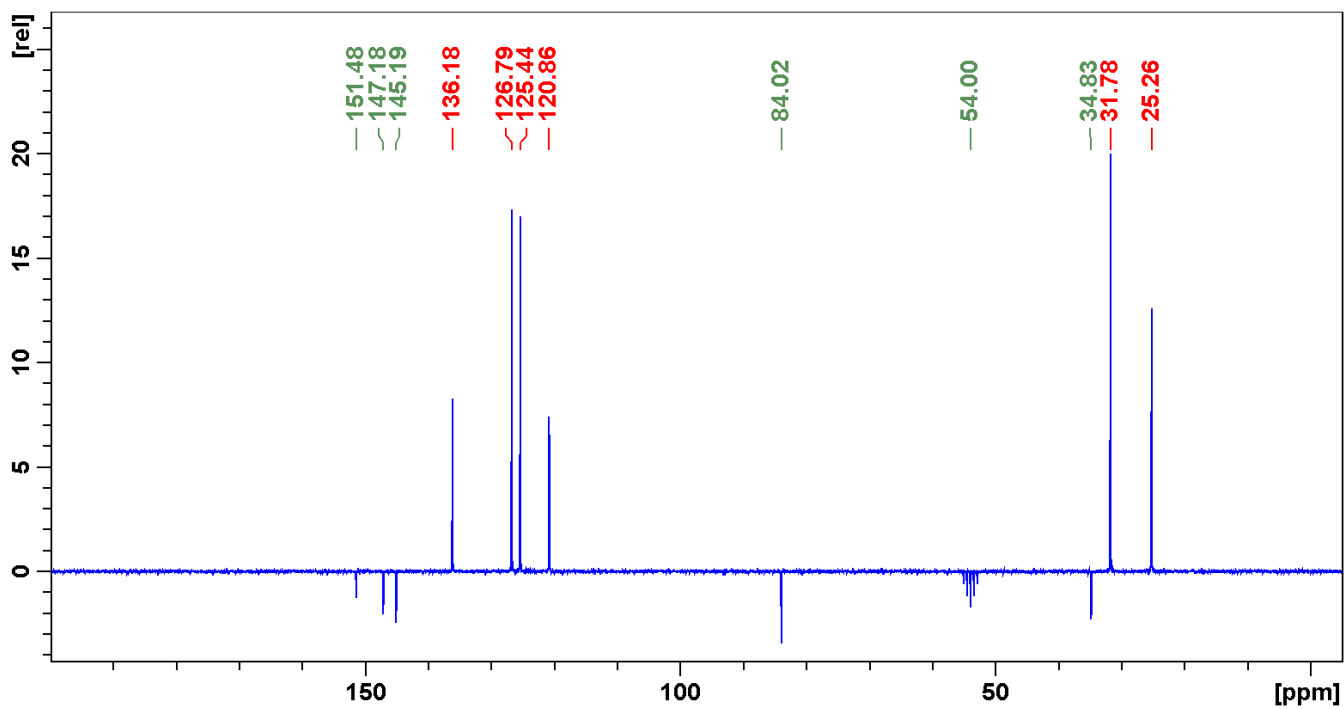

Figure S24. Carbon NMR spectrum of compound **8f**.

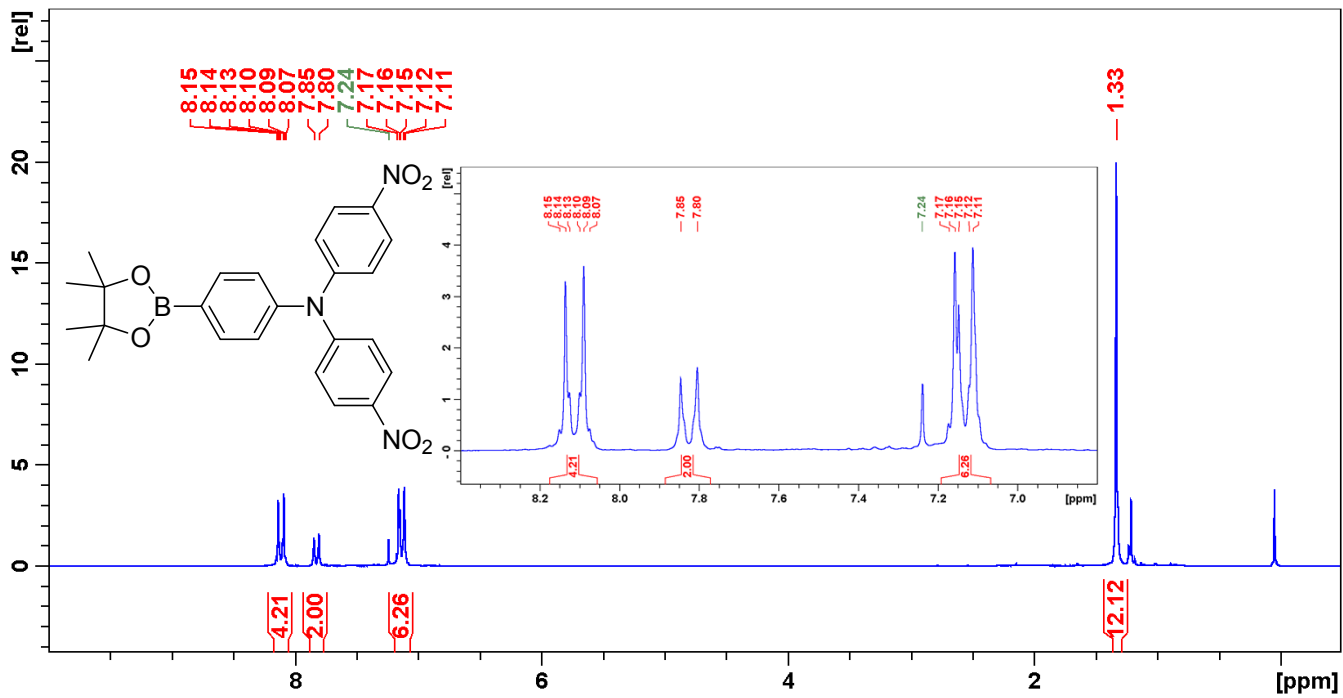

Figure S25. Proton NMR spectrum of compound **8g**.

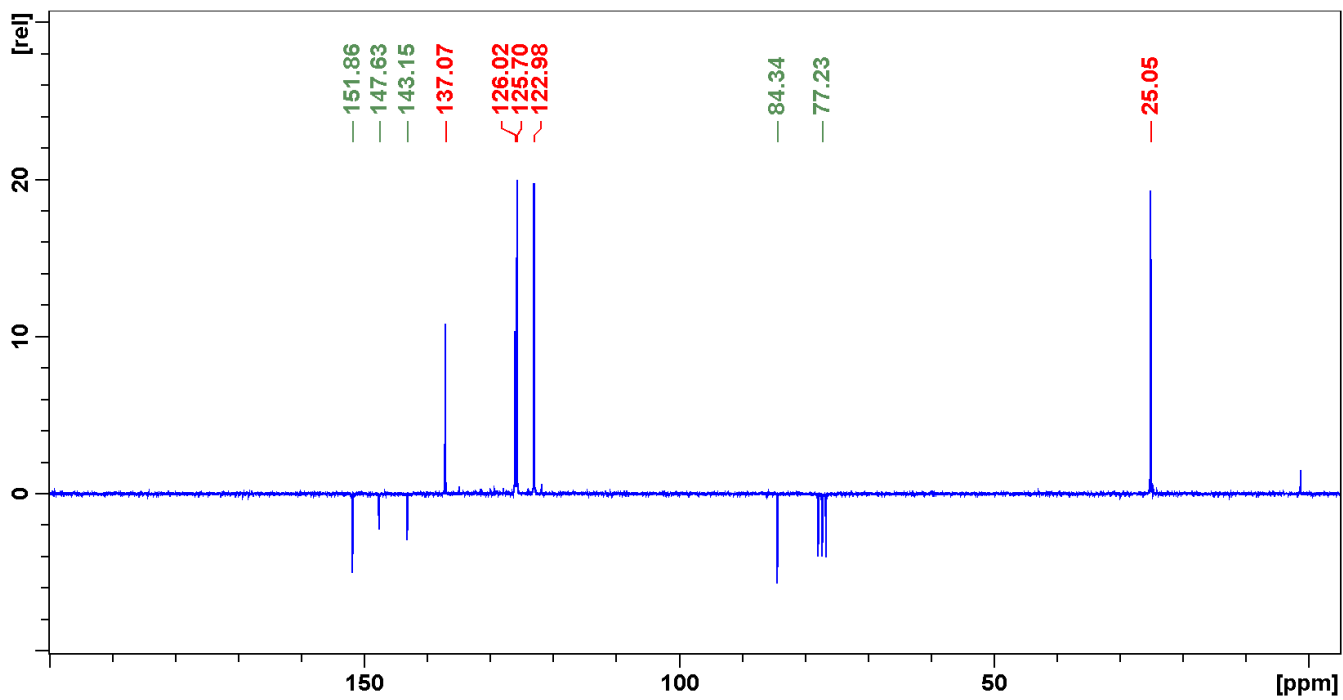

Figure S26. Carbon NMR spectrum of compound **8g**.

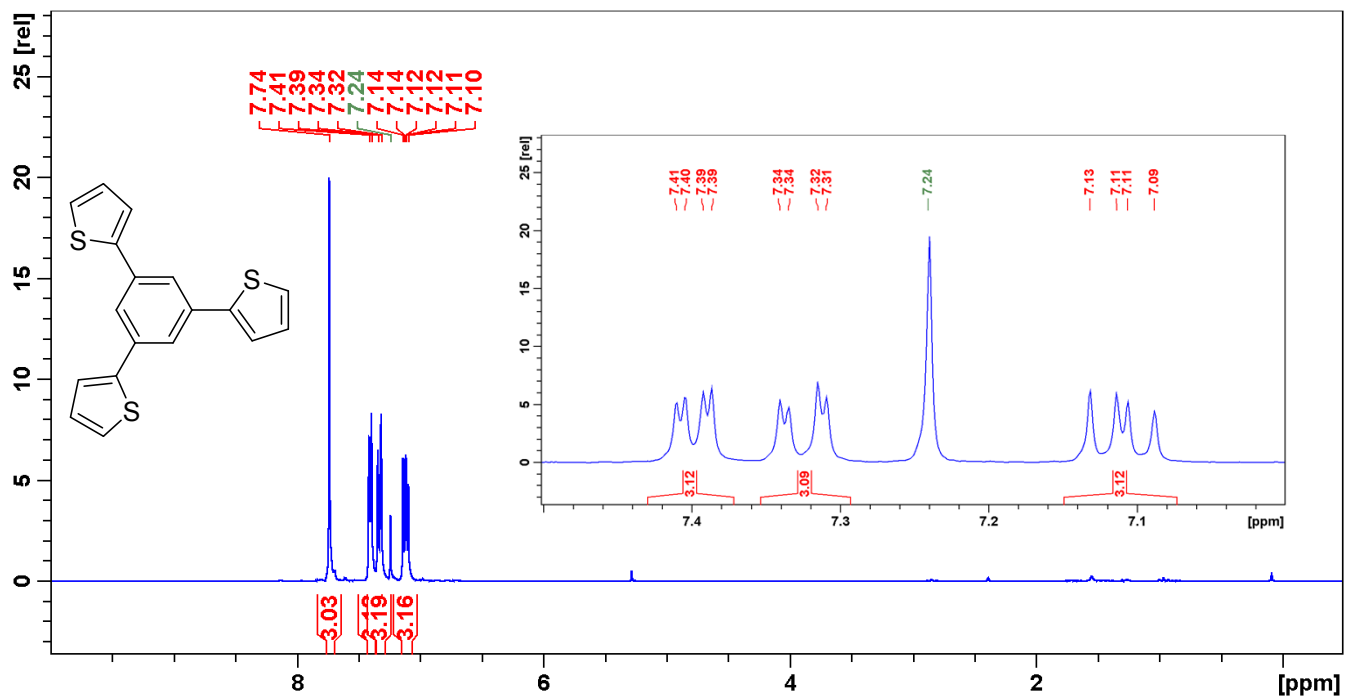

Figure S27. Proton NMR spectrum of compound 2.

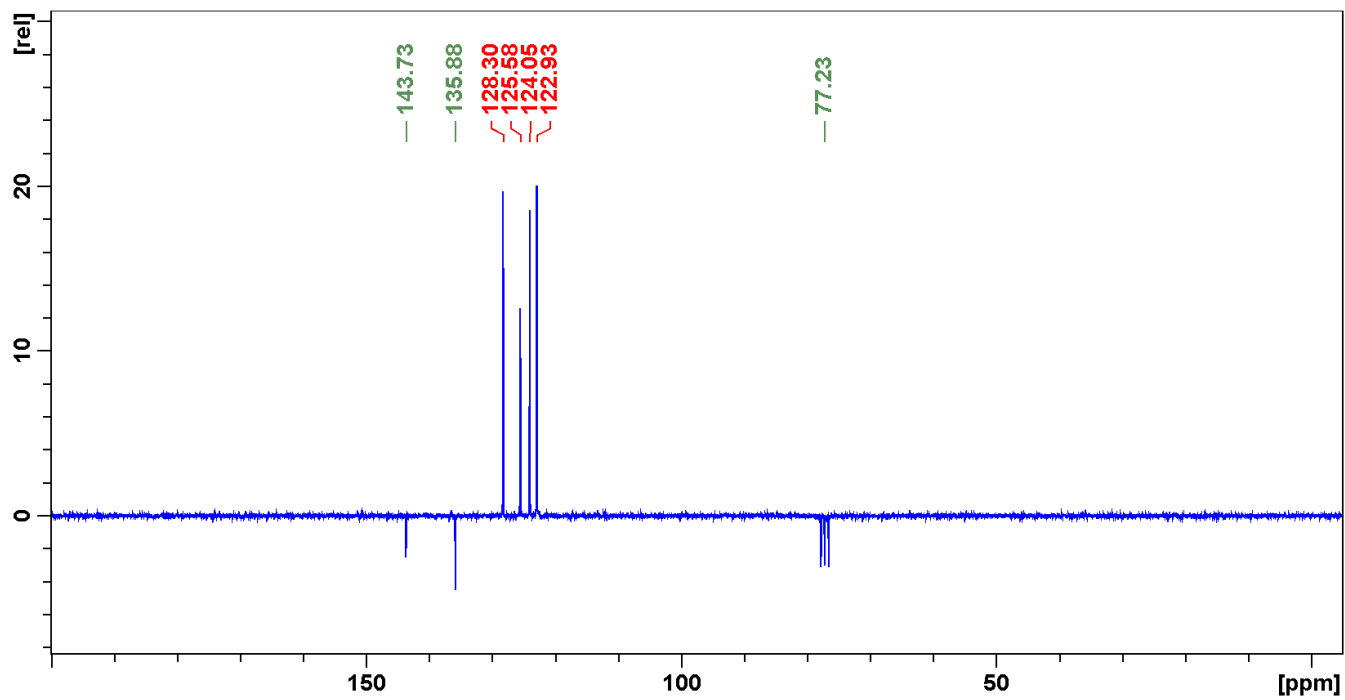

Figure S28. Carbon NMR spectrum of compound 2.

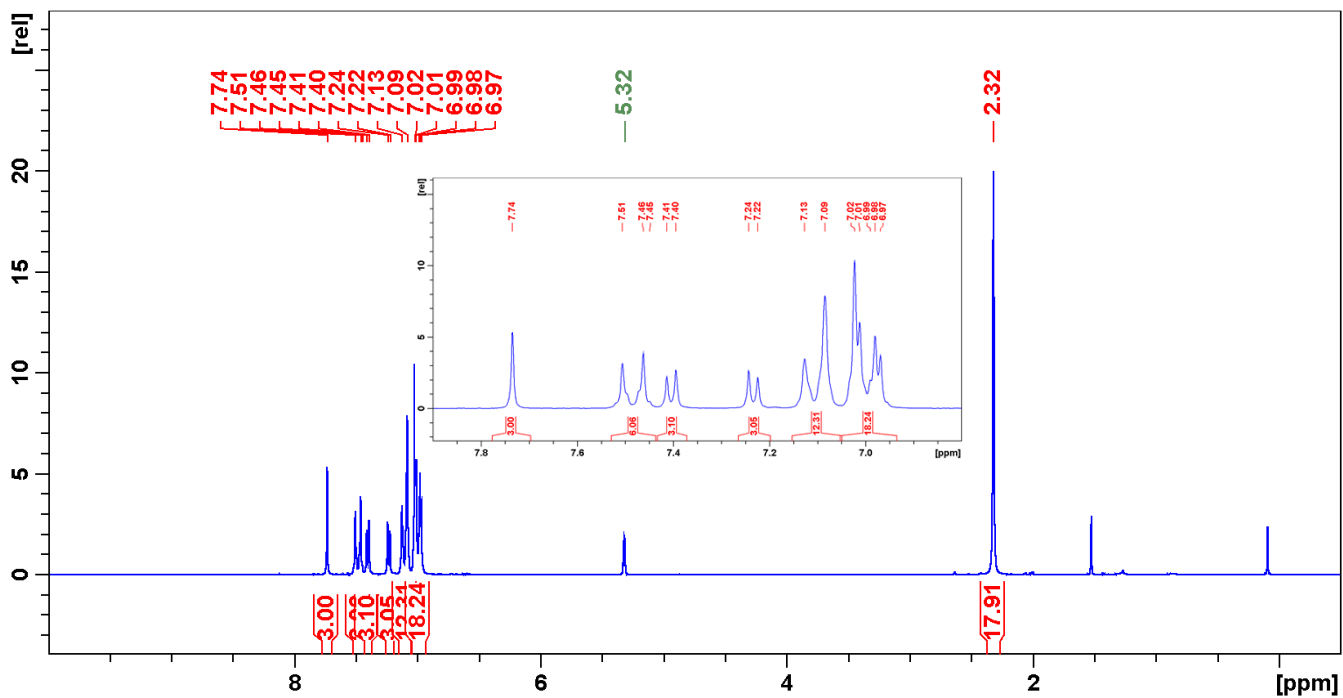

Figure S29. Proton NMR spectrum of compound S2.

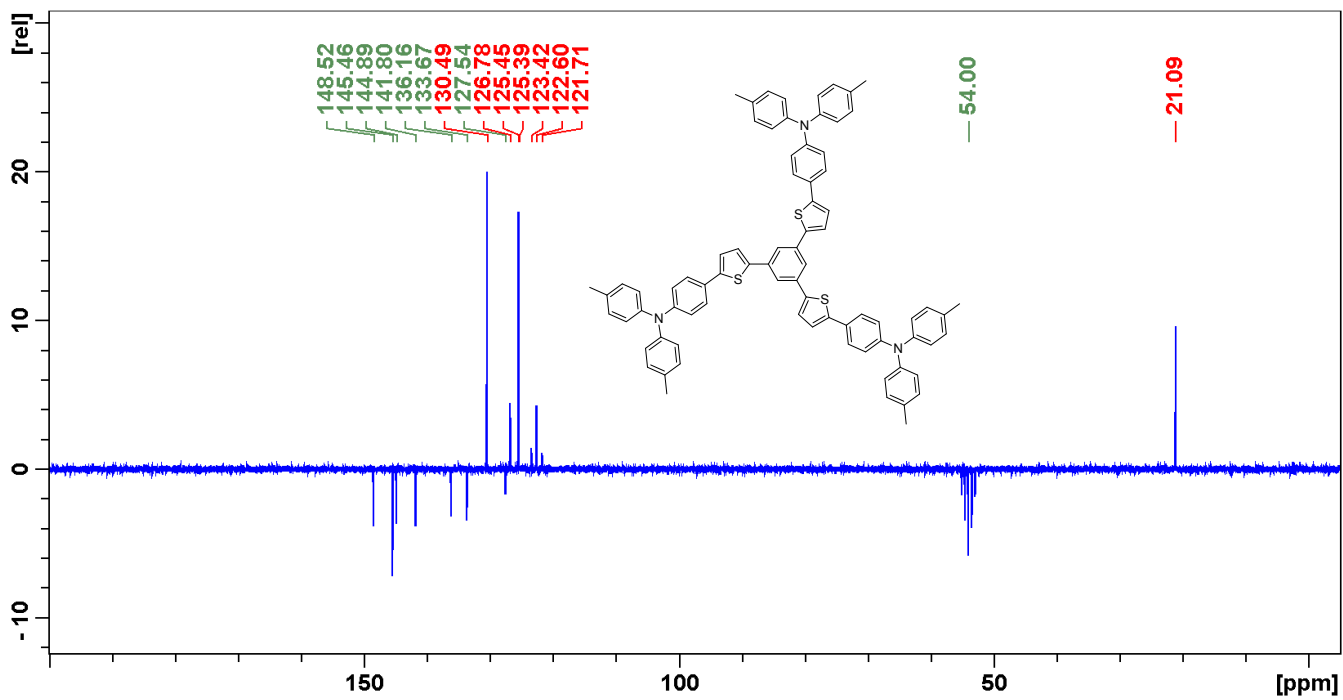

Figure S30. Carbon NMR spectrum of compound S2.



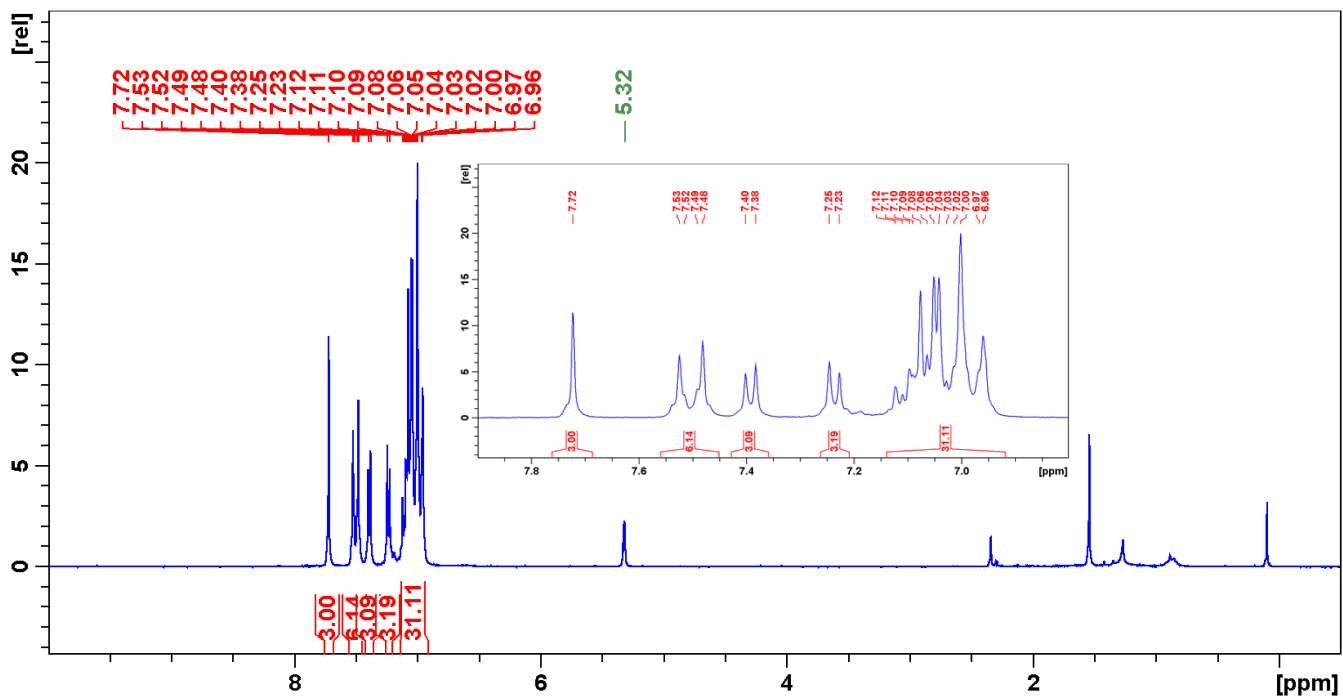

Figure S31. Proton NMR spectrum of compound S3.

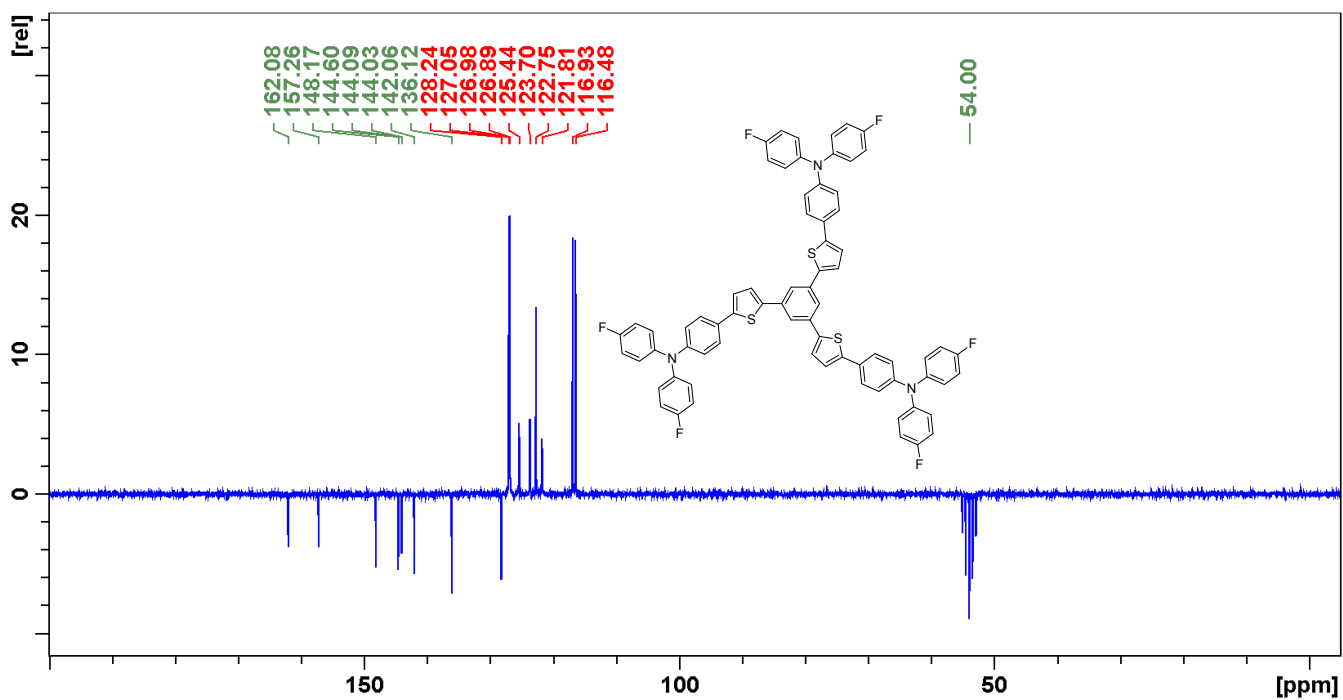

Figure S32. Carbon NMR spectrum of compound S3.

## B) Absorption and Emission Spectra

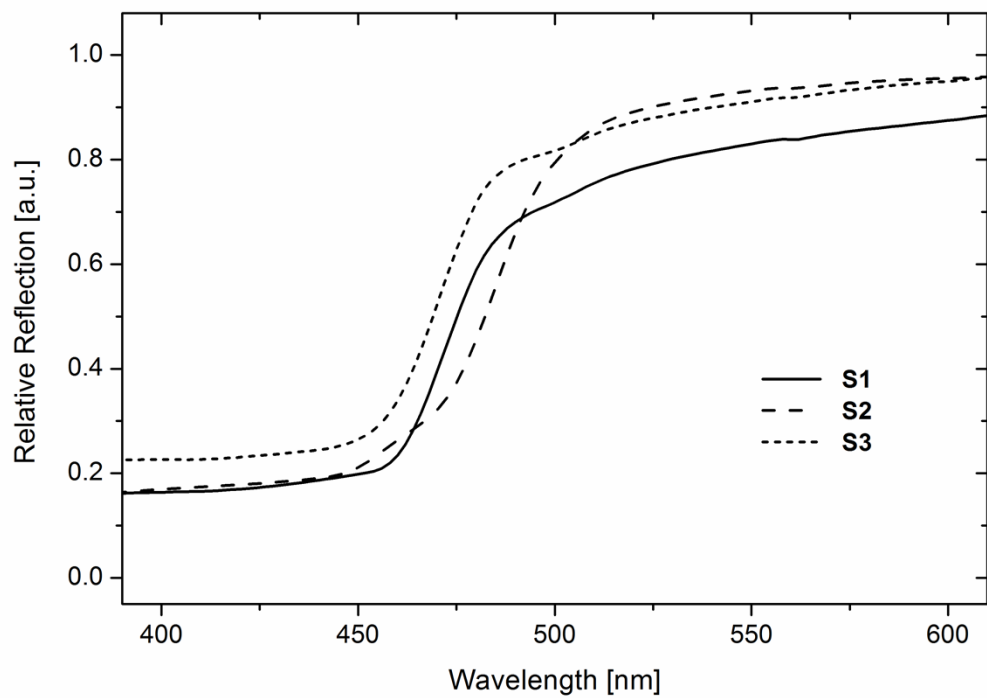

Figure S33. Absorption Spectra of Solid Samples

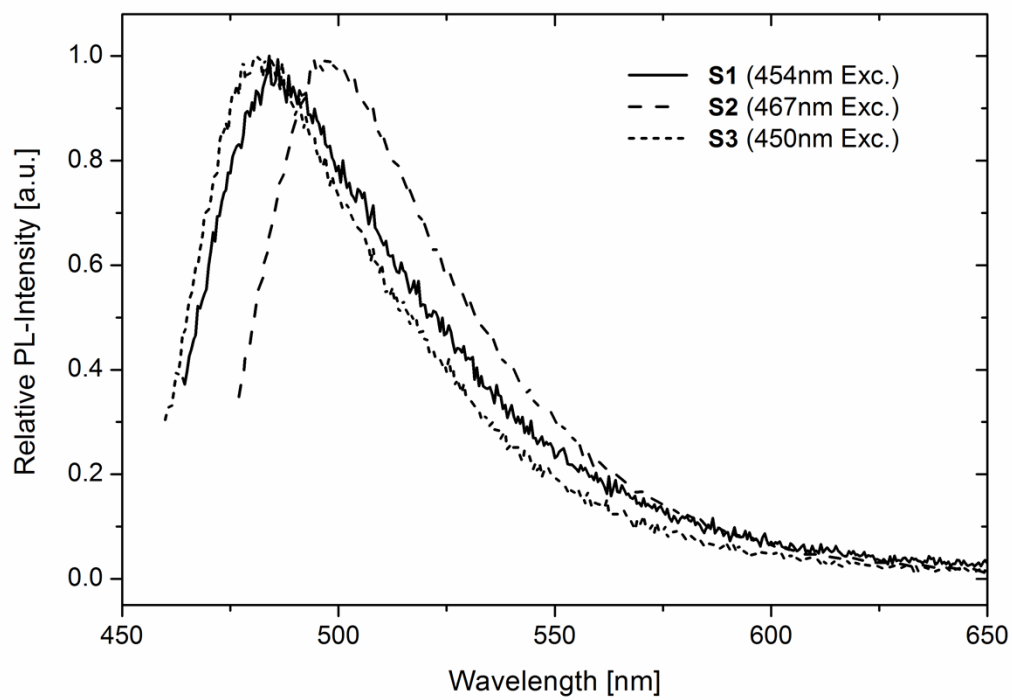

Figure S34. Emission Spectra of Solid Samples

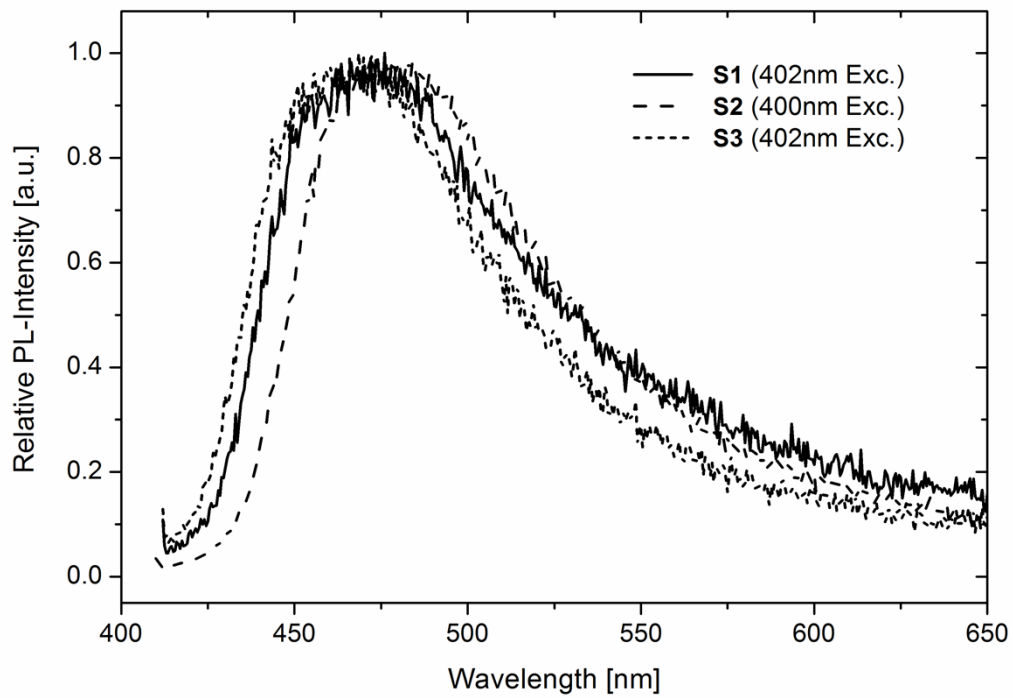

Figure S35. Emission Spectra of Film Samples

### C) HOMO/LUMO plots of S1-3

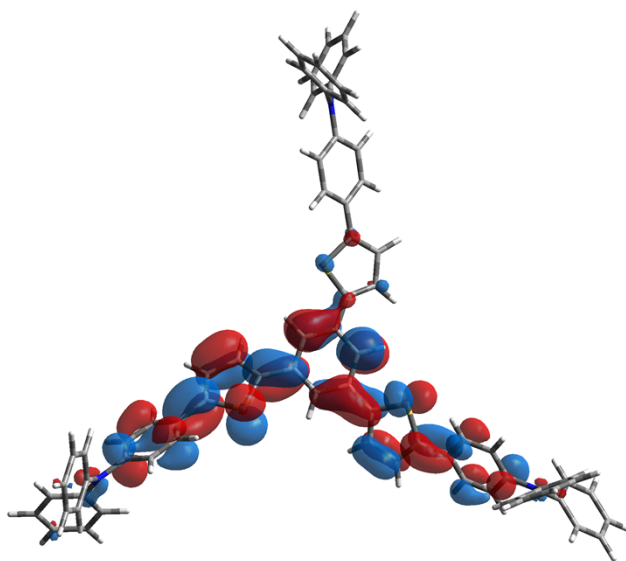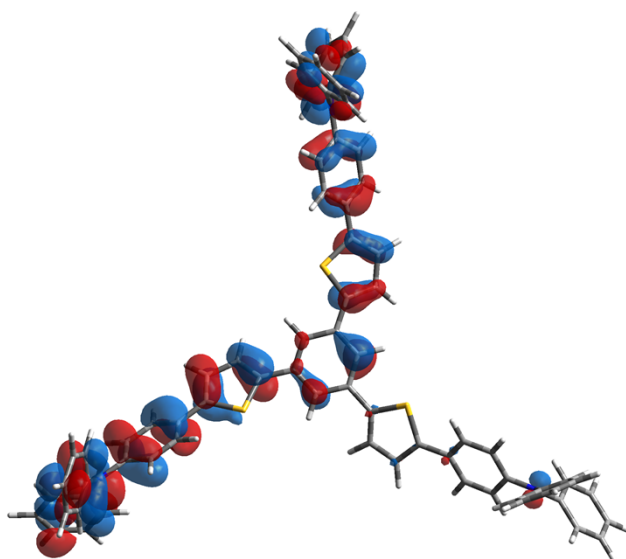

Figure S36. HOMO (bottom) and LUMO (top) of S1

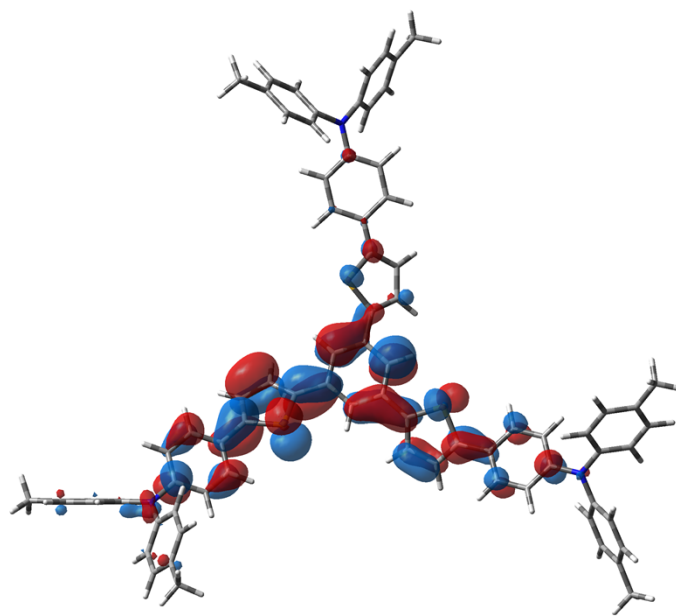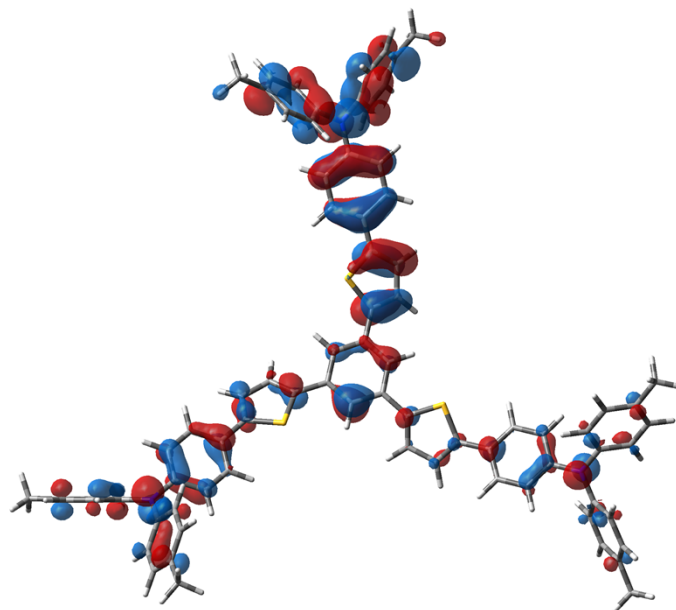

Figure S37. HOMO (bottom) and LUMO (top) of S2

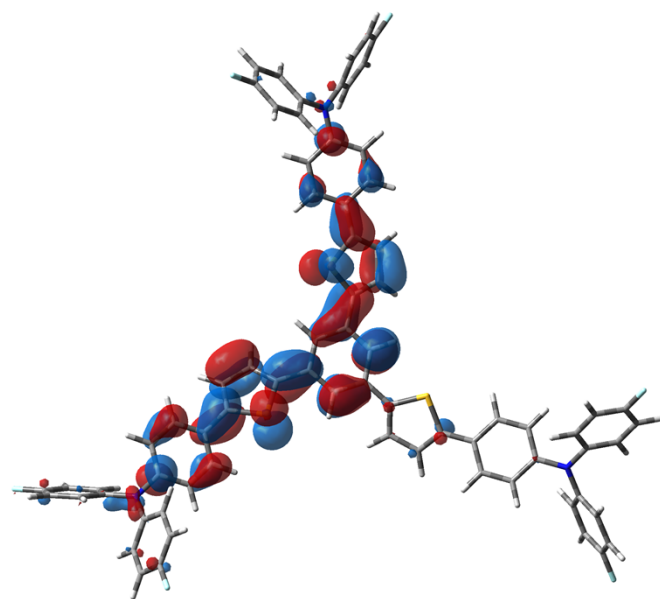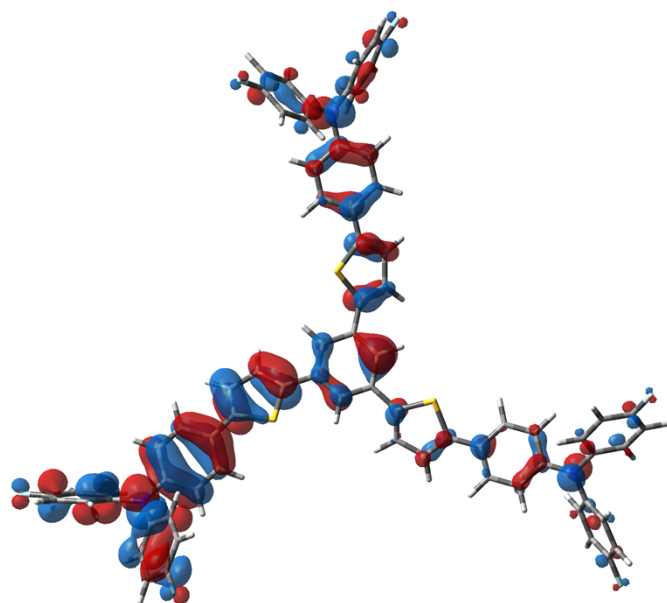

Figure S36. HOMO (bottom) and LUMO (top) of S3
